# 1 **Translational regulation of Pmt1 and Pmt2 by Bfr1 affects unfolded protein O-** 2 **mannosylation**

3  
4 Joan Castells-Ballester<sup>1</sup>, Natalie Rinis<sup>1</sup>, Ilgin Kotan<sup>2</sup>, Lihi Gal<sup>3</sup>, Daniela Bausewein<sup>1,4</sup>,  
5 Iliia Kats<sup>2</sup>, Ewa Zatorska<sup>1</sup>, Günter Kramer<sup>2</sup>, Bernd Bukau<sup>2</sup>, Maya Schuldiner<sup>3</sup> and  
6 Sabine Strahl<sup>1,\*</sup>

7  
8 <sup>1</sup> Centre for Organismal Studies (COS), Glycobiology, Heidelberg University, D-69120  
9 Heidelberg, Germany;

10 <sup>2</sup> Center for Molecular Biology of Heidelberg University (ZMBH), German Cancer  
11 Research Center (DKFZ), ZMBH-DKFZ Alliance, Heidelberg, Germany;

12 <sup>3</sup> Department of Molecular Genetics, Weizmann Institute of Science, 7610001  
13 Rehovot, Israel;

14 <sup>4</sup> present address: spm<sup>2</sup> - safety projects & more GmbH, D-69493 Hirschberg a. d.  
15 Bergstraße, Germany

16  
17 \* Correspondence – E-mail: [sabine.strahl@cos.uni-heidelberg.de](mailto:sabine.strahl@cos.uni-heidelberg.de); Phone: +49 (0)6221  
18 54 6286

## 19 20 **ABSTRACT**

21 O-mannosylation is implicated in protein quality control in *Saccharomyces cerevisiae*  
22 due to the attachment of mannose to serine and threonine residues of un- or misfolded  
23 proteins in the endoplasmic reticulum (ER). This process also designated as unfolded  
24 protein O-mannosylation (UPOM) that ends futile folding cycles and saves cellular  
25 resources is mainly mediated by protein O-mannosyltransferases Pmt1 and Pmt2.  
26 Here we describe a genetic screen for factors that influence O-mannosylation in yeast,  
27 using slow-folding GFP as a reporter. Our screening identifies the RNA binding protein  
28 brefeldin A resistance factor 1 (Bfr1) that has not been linked to O-mannosylation and  
29 ER protein quality control before. We find that Bfr1 affects O-mannosylation through  
30 changes in Pmt1 and Pmt2 protein abundance, but has no effect on *PMT1* and *PMT2*  
31 transcript levels, mRNA localization to the ER membrane or protein stability. Ribosome  
32 profiling reveals that Bfr1 is a crucial factor for Pmt1 and Pmt2 translation thereby

33 affecting unfolded protein O-mannosylation. Our results uncover a new level of  
34 regulation of protein quality control in the secretory pathway.

35

## 36 **KEYWORDS**

37 Bfr1, endoplasmic reticulum, mannosyltransferase, RNA binding, O-mannosylation,  
38 Pmt, protein quality control, translation, UPOM

39

## 40 **INTRODUCTION**

41 Glycosylation is a major protein modification that includes the addition of a sugar  
42 moiety onto a protein (Spiro, 2002). Two types of glycosylation conserved from fungi  
43 to humans are N-glycosylation and O-mannosylation (Neubert & Strahl, 2016). Both  
44 essential types of glycosylation start in the endoplasmic reticulum (ER) and share the  
45 common mannose donor Dol-P-mannose (Dol-P-Man). O-mannosylation entails the  
46 direct transfer of mannose from Dol-P-Man to serine and threonine residues of proteins  
47 entering the secretory pathway (herein referred to as secretory proteins) by different  
48 types of protein O-mannosyltransferase enzymes. Among those, only the protein O-  
49 mannosyltransferase (PMT) family is conserved among eukaryotes (Immervoll,  
50 Gentzsch, & Tanner, 1995; Jurado, Coloma, & Cruces, 1999; Lussier, Gentzsch,  
51 Sdicu, Bussey, & Tanner, 1995; Strahl-Bolsinger & Tanner, 1991; Willer, Amselgruber,  
52 Deutzmann, & Strahl, 2002). Changes in PMT-based O-mannosylation in humans  
53 result in genetic disorders called  $\alpha$ -dystroglycanopathies (Brancaccio, 2019) and are  
54 also associated with various cancers (Carvalho, Reis, & Pinho, 2016; Kumari, Das,  
55 Adhya, Rath, & Mishra, 2019). In the baker's yeast, *S. cerevisiae*, (from hereon termed  
56 simply yeast) O-mannosylation in the ER depends on PMTs only, making it an ideal  
57 model to study this crucial protein modification.

58 PMTs are ER membrane glycoproteins that have been shown to associate with the  
59 translocon to modify translocating polypeptides (Loibl et al., 2014). In yeast the  
60 redundant PMT family contains seven members, for six of which the O-  
61 mannosyltransferase activity has been proven. They are subdivided into three  
62 subfamilies referred to as PMT1 (Pmt1, Pmt5), PMT2 (Pmt2, Pmt3, Pmt6) and PMT4  
63 (Pmt4) that show distinct substrate specificities (Loibl & Strahl, 2013). Pmt1-Pmt2  
64 heterodimers contribute a major part of O-mannosyltransferase activity (Girrbach &  
65 Strahl, 2003).

66 Analysis of the yeast O-mannose glycoproteome revealed that around 20% of all ER  
67 and Golgi proteins are O-mannosylated many of those with crucial functions in protein  
68 glycosylation, folding, quality control and trafficking (Neubert et al., 2016). Hence it is  
69 not surprising that transcription of PMTs is enhanced under ER stress conditions  
70 (Travers et al., 2000) and general PMT inhibition induces the unfolded protein  
71 response (UPR) (Arroyo et al., 2011), a transcriptional response that regulates protein  
72 folding capacities of the ER and degradative processes termed ER associated  
73 degradation (ERAD) of un- or misfolded proteins (Hetz, 2012).

74 While most studies of O-mannosylation focus on the role of this modification during  
75 normal protein maturation along the secretory pathway, recently it has been  
76 demonstrated that there exists non-canonical O-mannosylation of proteins due to un-  
77 or misfolding (Xu & Ng, 2015a). This so-called unfolded protein O-mannosylation  
78 (UPOM) has been proposed as a molecular timer that is active in the early stages of  
79 ER protein quality control to abrogate futile folding cycles and save valuable cellular  
80 resources (Xu, Wang, Thibault, & Ng, 2013). Substrates that undergo UPOM have  
81 been shown to later be eliminated by the cell either by ERAD (Hirayama, Fujita, Yoko-  
82 o, & Jigami, 2008), vacuolar degradation (Coughlan, Walker, Cochran, Wittrup, &  
83 Brodsky, 2004) or cellular exclusion (Nakatsukasa et al., 2004). Similarly to O-  
84 mannosylation during maturation, modification during UPOM seems to also rely mostly  
85 on Pmt1 and Pmt2 (Goder & Melero, 2011; Xu et al., 2013). The most prominent UPOM  
86 substrate to date is slow-folding GFP that folds properly in the cytosol, but when  
87 targeted to the ER is recognized as a misfolded protein due to its slow folding and  
88 therefore gets O-mannosylated (Xu et al., 2013). O-mannosylation itself then blocks  
89 further folding of the fluorophore resulting in decreased fluorescence intensity  
90 rendering this protein an adequate reporter to monitor UPOM efficiency.

91 With the exception of Pmt1 and Pmt2 that mediate UPOM this protein quality control  
92 system is poorly defined. In the present study we screened for cellular factors that  
93 affect UPOM in yeast. To this end we took advantage of ER-targeted slow-folding GFP  
94 as a UPOM-reporter and identified brefeldin A resistance factor 1 (Bfr1) as an  
95 enhancer of Pmt1 and Pmt2 translation.

96

## 97 **RESULTS**

### 98 **Genome-wide screen reveals Bfr1 as a factor influencing UPOM**

99 To perform a genome-wide screen for identification of cellular factors affecting UPOM  
100 we took advantage of the model UPOM substrate, slow-folding ER-GFP (Xu et al.,  
101 2013). We stably introduced ER-GFP into the innocuous *HO* locus of *pmt1Δ*, *pmt2Δ*  
102 and *pmt4Δ* cells. ER targeting of GFP was ensured by an N-terminal Kar2 signal  
103 peptide and ER retention by a C-terminal HDEL retention signal (Fig. 1A, upper  
104 scheme). A fast folding variant of GFP (ER-GFP<sub>f</sub>) that escapes O-mannosylation and  
105 therefore changes in folding and fluorescence served as a negative control (Fisher &  
106 DeLisa, 2008). As shown in Fig. 1B ER-GFP shows reduced fluorescence compared  
107 to ER-GFP<sub>f</sub> expressed in wild type cells. In *pmt1Δ* and *pmt2Δ* cells reporter  
108 fluorescence is considerably enhanced compared to wild type whereas the GFP signal  
109 in *pmt4Δ* is not affected (Fig. 1B, C). These results are in line with previously published  
110 data in which ER-GFP is expressed from a centromeric plasmid (Xu et al., 2013). O-  
111 mannosylation of ER-GFP in wild type and *PMT* deletion mutants was monitored by  
112 probing lysates of respective cells for GFP (Fig. 1D). ER-GFP detection results in a  
113 main GFP signal accompanied by multiple higher molecular weight bands that are not  
114 seen in case of ER-GFP<sub>f</sub> (Fig. 1D, compare area designated by the white arrow in  
115 lanes 2 and 3). The same GFP pattern is detected in *PMT4* deficient (lane 6) but not  
116 *PMT1* and *PMT2* deficient cells (lanes 4 and 5) and correlates with O-mannosylation  
117 of ER-GFP. Treatment of immunopurified FLAG-tagged ER-GFP (Fig. 1A, lower  
118 scheme) with  $\alpha$ 1-2,3,6 mannosidase that removes O-linked  $\alpha$ -mannose (Winterhalter,  
119 Lommel, Ruppert, & Strahl, 2013) confirmed that the signal above the main GFP band  
120 emanates from O-mannosyl glycans (Fig. 1E). We further examined whether ER-GFP  
121 expression that is driven by the strong *TDH3* promoter induces ER stress resulting in  
122 UPR induction (Fig. 1F). In contrast to ER-GFP<sub>f</sub>, expression of ER-GFP triggers the  
123 UPR as indicated by the significant increase of mRNA levels of the spliced (active)  
124 variant (Fig. 1F, *HAC1s*) of the UPR-inducing transcription factor Hac1 and the UPR-  
125 targeted Hsp70 chaperone Kar2. This suggests that at least in the case of GFP, slow  
126 folding rates rather than protein overexpression constitute the biggest challenge for the  
127 ER.

128 As depicted in Fig. 2A, the ER-GFP expressing wild type strain was crossed with  
129 libraries containing viable deletion strains of non-essential genes and hypomorphic  
130 mutants of essential ones to create new libraries in which each haploid strain  
131 expresses the ER-GFP on the background of one mutant allele. The median  
132 fluorescence intensities (MFIs) of all viable strains resulting upon crossing are shown

133 in Fig. 2B (small diagram on the right) and a detailed listing of all identified targets is  
134 available in Suppl. Table S1. Analysis of ER-GFP median intensity frequency  
135 distribution for more than 5000 viable mutant strains revealed that approximately 5%  
136 displayed fluorescence exceeding the MFI range of ER-GFP in wild type cells (Fig. 2B,  
137 zoomed in area and green bars in bar diagram). A total of 109 genes exceeded the  
138 threshold (median GFP intensity at 187, red dotted line in Fig. 2B) and were considered  
139 as positive hits (Suppl. Table S1). Validity of the screen was confirmed by the presence  
140 of *PMT1* (position 38) and *PMT2* (position 3) among the positive candidates. Further  
141 analysis of screening hits was performed by manual assessment of GFP signal  
142 localization to the ER. Out of 109 candidates, only *spf1Δ* cells showed predominant  
143 cytosolic GFP fluorescence further confirmed in an independent *spf1Δ* mutant by  
144 fluorescence microscopy (Suppl. Fig. 1A). Among the residual 108 candidates stress  
145 pathway components (e.g. *oca1Δ* and *oca2Δ* involved in oxidative stress response;  
146 *sln1Δ*, *ptc1Δ* and *sic1Δ* encoding for functional components of the high osmolarity  
147 glycerol (HOG) pathway) and components of N-glycosylation and quality control (e.g.  
148 *ost3Δ* (Suppl. Fig. 2) and *cwh41Δ*) were present. Analysis of the O-mannosylation  
149 status of the canonical Pmt1-Pmt2 client Hsp150 revealed that the vast majority of the  
150 mutants do not severely affect O-mannosylation in general, judging by the prevalence  
151 of the molecular mass of Hsp150 upon the gene deletions. However, in a substantial  
152 number of mutants, we observed the presence of subspecies of Hsp150 that likely  
153 result from general maturation defects (Suppl. Table S1). Among those are for example  
154 *ost3Δ* and *pop2Δ* (Suppl. Fig. 1B) that affect N-glycosylation and mRNA catabolism,  
155 respectively, and for which general defects in protein homeostasis have been reported  
156 previously (Preissler et al., 2015; Stevens et al., 2017). Since we were especially  
157 interested in candidates that directly affect glycosylation of the UPOM-reporter  
158 systematic analysis of candidate genes was performed by determining ER-GFP O-  
159 mannosylation by Western blot. This revealed that for most of the tested mutant strains  
160 increased GFP fluorescence did not correlate with significantly reduced O-  
161 mannosylation (Suppl. Table S1). Next to *pmt1Δ* and *pmt2Δ*, only two additional  
162 mutants were found to abrogate ER-GFP O-mannosylation: *bfr1Δ* (Fig. 2C, D) and  
163 *psa1<sup>DAmP</sup>* (Suppl. Fig. 3A). *PSA1* is an essential gene encoding for the enzyme GDP-  
164 mannose pyrophosphorylase that is responsible for the synthesis of GDP-mannose,  
165 the mannose donor in Dol-P-Man synthesis (Hashimoto, Sakakibara, Yamasaki, &  
166 Yoda, 1997) (Suppl. Fig. 3B). Since decreased expression of Psa1 in the *psa1<sup>DAmP</sup>*

167 most likely limits availability of the mannose donor Dol-P-Man thereby affecting PMT  
168 activity, we decided to herein focus on *BFR1* whose role remains unknown.

169 We verified that in *bfr1Δ* cells, a strong decrease of ER-GFP O-mannosylation (Fig.  
170 2C, compare lanes 1 and 4) goes hand in hand with significantly increased ER-GFP  
171 fluorescence compared to wild type as assessed by flow cytometry and fluorescence  
172 microscopy (Fig. 2D), in agreement with improved folding of the reporter. Enhanced  
173 ER-GFP fluorescence upon *BFR1* deletion was confirmed via flow cytometry in several  
174 independent mutants (Suppl. Fig. 4). All in all, our screen uncovered an unexpected  
175 role for Bfr1 in O-mannosylation.

176

### 177 **Bfr1 affects UPOM by modulating Pmt1 and Pmt2 protein levels**

178 *BFR1* was identified in a genetic screen as a multicopy suppressor of brefeldin A  
179 induced lethality in yeast (Jackson & Kepes, 1994). It is associated with mRNA  
180 metabolism as it was shown to interact with the RNA binding protein Scp160 in  
181 polyribosome associated mRNP complexes (Lang, Li, Black-Brewster, & Fridovich-  
182 Keil, 2001). Since then mRNA related functions of Bfr1 have gained increasing  
183 attention: Bfr1 was shown to affect P-body formation (Simpson, Lui, Kershaw, Sims, &  
184 Ashe, 2014; Weidner, Wang, Prescianotto-Baschong, Estrada, & Spang, 2014) and to  
185 bind hundreds of mRNAs despite the fact that it lacks canonical RNA binding domains  
186 (Hogan, Riordan, Gerber, Herschlag, & Brown, 2008; Lapointe, Wilinski, Saunders, &  
187 Wickens, 2015).

188 Considering the role of Bfr1 in mRNA metabolism and the recent finding that Bfr1 binds  
189 *PMT1* and *PMT2* transcripts (Lapointe et al., 2015) we hypothesized that Bfr1 could  
190 affect UPOM by modulating Pmt1 and Pmt2 protein levels. We therefore analyzed  
191 Pmt1 and Pmt2 protein abundance in wild type versus *bfr1Δ* cells (Fig. 3A, B, left  
192 panels). Our results show that Pmt1 and Pmt2 protein levels are markedly reduced in  
193 *BFR1* deficient versus wild type cells. This holds true under ER stress conditions  
194 caused by the ER-GFP reporter in the screening strain background (compare lanes 2  
195 and 4 in Fig. 3A, B) with Pmt1 and Pmt2 levels increased in response to UPR (compare  
196 lanes 1 and 2 in Fig. 3A, B) as well as in the absence of ER-GFP in an independent  
197 strain background (compare lanes 1 and 3 in Fig. 3A, B). Quantification of PMT protein  
198 levels reveals a significant 2-fold reduction for both PMTs (Fig. 3A, B, right panels) in  
199 *bfr1Δ* versus wild type cells.

200 Since Bfr1 binds to numerous mRNAs we investigated the effect of *BFR1* deletion on  
201 protein levels of representative Bfr1 interactors (Lapointe et al., 2015) involved in  
202 protein import such as the main translocon subunit Sec61 (Deshaies & Schekman,  
203 1987), quality control such as the Hsp70 chaperone Kar2 (Rose, Misra, & Vogel, 1989)  
204 and N-glycosylation such as oligosaccharyl transferase (OST) subunits Ost3 and  
205 Wbp1 (Karaoglu, Kelleher, & Gilmore, 1995; te Heesen, Janetzky, Lehle, & Aebi,  
206 1992). We also analyzed protein levels of the GPI-anchored protein Gas1 that is highly  
207 O-mannosylated (Nuoffer, Jeno, Conzelmann, & Riezman, 1991) (Fig. 3C). Results  
208 show no major changes in protein levels for any of these Bfr1 targets in wild type versus  
209 *bfr1* $\Delta$  cells (compare lane 1 with 3 and 2 with 4 in Fig. 3C) suggesting that Bfr1 binding  
210 to mRNA alone is not sufficient to affect protein abundance.

211 To further substantiate the finding that O-mannosylation defects observed upon *BFR1*  
212 deletion result directly from decreased protein levels of Pmt1 and Pmt2, we performed  
213 a functional rescue experiment by overexpressing Pmt2. As shown in Fig. 4A Pmt2  
214 overexpression restores O-mannosylation of ER-GFP in *BFR1* deficient cells. In  
215 agreement Pmt2 overexpression significantly reduces GFP fluorescence detected in  
216 *bfr1* $\Delta$  cells, however, not to wild type levels (Fig. 4B). In *BFR1* deficient cells Pmt2  
217 protein levels are markedly decreased compared to wild type (Fig. 4C, compare lanes  
218 1 and 3), even upon Pmt2 overexpression (compare lanes 2 and 4) and irrespective of  
219 ER stress caused by ER-GFP expression (compare lane 5 with 7 and 6 with 8). Inability  
220 to restore native Pmt2 levels as well as reduced levels of Pmt1 may explain why full  
221 complementation of ER-GFP O-mannosylation could not be gained. Taken together,  
222 our data show that the aberrant O-mannosylation of ER-GFP in *bfr1* $\Delta$  cells is a direct  
223 consequence of decreased Pmt1 and Pmt2 protein levels and that Bfr1 affects UPOM  
224 by controlling the abundance of these enzymes.

225

### 226 **Bfr1 affects Pmt1 and Pmt2 protein levels on a posttranscriptional level**

227 We next analyzed whether Bfr1 affects *PMT* transcript levels by measuring *PMT1* and  
228 *PMT2* mRNA abundance in wild type versus *bfr1* $\Delta$  cells (Fig. 5A). No significant  
229 changes in mRNA levels for both PMTs were found. To exclude impact of mRNA  
230 5' regions *PMT2* was placed under the control of a *GAL1* inducible promotor and Pmt2  
231 protein as well as transcript levels were assessed in wild type versus mutant cells.  
232 Pmt2 protein levels were markedly reduced in *BFR1* deficient cells (Fig. 5B, compare  
233 lanes 3 and 4) whereas transcript levels were unaffected (Fig. 5C). These results

234 pointed to a posttranscriptional control of PMT synthesis mediated by either reduced  
235 translation or reduced protein stability in *bfr1*Δ cells. Cycloheximide chase experiments  
236 demonstrated that protein stability was not affected in *bfr1*Δ mutants (Fig. 5D),  
237 suggesting a possible effect of Bfr1 on translation efficiency.

238

### 239 ***BFR1* deletion does not affect *PMT1* and *PMT2* mRNA localization to the ER**

240 Cotranslational protein translocation requires targeting of mRNAs encoding for  
241 secretory proteins to the ER membrane (Aviram & Schuldiner, 2017) and implies  
242 recognition of the signal sequence by the signal recognition particle for delivery to the  
243 translocon (Gilmore, Blobel, & Walter, 1982; Meyer, Krause, & Dobberstein, 1982).  
244 Additional concepts, however, have emerged that postulate translation independent  
245 mRNA recruitment by ER membrane associated RNA binding proteins (Singer-Kruger  
246 & Jansen, 2014). In this case transcript recruitment is mediated by *cis* elements  
247 present on the mRNA itself and *trans*-acting RNA binding proteins (Kraut-Cohen et al.,  
248 2013). Given that Bfr1 mainly interacts with polysomes associated with the ER  
249 membrane (Lang et al., 2001) and that Bfr1 interacting mRNAs are enriched for  
250 secretory proteins (Lapointe et al., 2015) we analyzed whether *PMT1* and *PMT2*  
251 transcript localization was affected in *bfr1*Δ cells by subcellular fractionation. To this  
252 end soluble and membrane fractions of total cell extracts from *bfr1*Δ cells were  
253 separated by ultracentrifugation and *PMT2* transcript levels were analyzed in both  
254 fractions (Fig. 6A, B). The calculated *PMT2* mRNA ratio of membrane to soluble  
255 fraction is approximately 1 for wild type cells indicating equal distribution of *PMT2*  
256 between both fractions. In *BFR1* deficient cells the *PMT2* mRNA ratio does not  
257 significantly change (Fig. 6B).

258 In addition, total cell extracts from wild type cells expressing fully functional HA-tagged  
259 Bfr1 and *bfr1*Δ cells were fractionated on a sucrose step gradient. Analysis of the RNA  
260 content of 20 collected fractions showed enrichment of ribosomes in fractions F10 and  
261 F16 (Fig. 6C). The respective control experiment was performed with EDTA  
262 supplemented lysates and resulted in the shift of both Absorbance<sub>260</sub> peaks observed  
263 for F10 and F16 to soluble fractions in line with ribosomal disassembly (Suppl. Fig. 5).  
264 Analysis of specific marker proteins within F5, F10 and F16 reveals efficient separation  
265 of cytosolic and membrane fractions (Fig. 6D, compare lanes 2 and 4). All analyzed  
266 fractions contain ribosomes as assessed by the ribosomal protein Rpl5, however, to  
267 different extents. F10 represents the cytoplasmic polyribosome fraction whereas F16



268 contains ER membrane bound polysomes (Fig. 6D, compare Sec61 in lanes 3 and 4).  
269 Bfr1 was found throughout fractions consistent with reports of this cytosolic protein  
270 being associated with polyribosomes. Analysis of mRNA content in ribosome  
271 containing fractions F10 and F16 in wild type cells showed strong engagement of  
272 *PMT1*, *PMT2* and *SEC61* mRNA with ER membrane associated ribosomes whereas  
273 only minor amounts of these mRNAs were detectable in the cytoplasmic fraction F10  
274 (Fig. 6E, lanes 1 and 2 respectively). In *BFR1* deficient cells distribution of neither  
275 *PMT1* and *PMT2* mRNAs nor *SEC61* and *ACT1* mRNAs was changed compared to  
276 wild type cells. In combination our data show that *PMT2* transcripts are equally  
277 distributed between the cytosolic and ER membrane bound polysomal fraction and that  
278 *PMT1* and *PMT2* mRNAs preferentially colocalize with membrane bound  
279 polyribosomes irrespective of Bfr1 presence.

280

### 281 **Bfr1 affects Pmt1 and Pmt2 translation**

282 Next, we analyzed translation dynamics in wild type versus *bfr1* $\Delta$  cells by ribosome  
283 profiling, which provides a quantitative and high-resolution profile of *in vivo* translation  
284 and is based on deep sequencing of ribosome protected mRNA fragments (Ingolia,  
285 Ghaemmaghami, Newman, & Weissman, 2009). Protein synthesis rates are derived  
286 from average ribosomal density along mRNAs based on two fundamental  
287 assumptions: that all ribosomes complete translation and that elongation rates are  
288 similar among different mRNAs (Brar & Weissman, 2015). Ribosomal densities along  
289 transcripts show active translation and provide a snapshot of protein synthesis within  
290 the cell independent of transcript levels.

291 Ribosome profiling was performed in duplicate for both wild type and *BFR1* deficient  
292 cells. Replicates showed high correlation of reads per million mapped reads (RPM)  
293 values ( $r^2=0.99$  and  $r^2=0.97$  for wild type and *bfr1* $\Delta$  cells, respectively) (Suppl. Fig. 6A;  
294 Suppl. Table S2). RPM values of wild type and *bfr1* $\Delta$  cells also showed high correlation  
295 ( $r^2=0.97$ ) (Suppl. Fig. 6B; Suppl. Table S2) ruling out a generalized effect on  
296 translation. Statistical analysis revealed comparable subsets of genes significantly up-  
297 or downregulated at 0.01 false discovery rate (FDR) (red dots on Fig. 7A). For Pmt1  
298 and Pmt2 ribosome profiling data demonstrate a *bfr1* $\Delta$  to wild type ratio of averaged  
299 RPMs of 0.581 and 0.596 respectively that corresponds to a significant 1.7-fold  
300 decrease of ribosomal footprint density and therefore active protein synthesis in *BFR1*  
301 deficient cells. This decrease in active translation correlates with the approximate 2-

302 fold decrease in PMT protein abundance detected in *bfr1*Δ cells (Fig. 3A, B). In line  
303 with this observation, active translation of representative Bfr1 targets whose  
304 expression levels did not change upon *BFR1* deletion (Fig. 3C), remain unaffected with  
305 the exception of Kar2 (wild type/*bfr1*Δ=0.582) (Suppl. Table S2). Since *PMT1* and  
306 *PMT2* transcript levels do not change between wild type and mutant cells whereas  
307 ribosomal density is 1.7-fold lower these results reveal Bfr1 as a translational enhancer  
308 of Pmt1 and Pmt2. Furthermore, we combined our ribosomal footprint data with the  
309 Bfr1 mRNA interactome unraveled by Lapointe *et al.* (Lapointe et al., 2015). The 174  
310 strongest mRNA interactors (Fig. 7B, class A) include 104 mRNAs encoding for  
311 proteins of the secretome (filled dots) defined by Ast *et al.* (Ast, Cohen, & Schuldiner,  
312 2013). Translation of 35 mRNAs, all encoding secretome proteins, is significantly  
313 reduced in absence of *BFR1*, suggesting that Bfr1 preferentially affects translation of  
314 ER-targeted proteins. Intriguingly, GO functional annotation clustering identified  
315 among those targets protein glycosylation (*PMT1*, *OST1*, *PMT2*, *PMT3*, *PMT4*, *KTR1*,  
316 *STT3*, *ALG12*) and ergosterol biosynthesis (*ERG24*, *ERG3*, *NCP1*, *ERG4*, *ERG11*) as  
317 major functional clusters, pointing to Bfr1 as an important factor governing these  
318 processes.

319

## 320 **DISCUSSION**

321 In recent years, protein O-mannosylation proved to be critically important for ER  
322 protein quality control. O-mannosylation affects ER protein homeostasis at different  
323 levels. On one hand, stress sensors as well as other crucial components of protein  
324 folding and quality control machineries carry O-mannosyl glycans which may directly  
325 impact on their function (Castells-Ballester et al., 2018; Neubert et al., 2016). On the  
326 other hand, un- or misfolded proteins receive O-mannosyl glycans which label them  
327 for ER clearance (Xu & Ng, 2015b). In a first effort to identify factors that affect UPOM,  
328 the Pmt1-Pmt2 complex proved to be a central hub for ER protein quality control.

329 Among our screening hits we find several mutants that probably impact on ER protein  
330 folding but do not directly affect O-mannosylation of the UPOM-reporter (Suppl. Table  
331 S1). An example is *INO2* that encodes for a transcription factor responsible for  
332 derepression of phospholipid biosynthetic genes (Ambroziak & Henry, 1994).  
333 Membrane phospholipid perturbations have been linked to chronic ER stress in *S.*  
334 *cerevisiae* (Shyu et al., 2019). The presence of *INO2* as well as *SPF1* that was reported  
335 to cause ergosterol deficiency in the ER (Sorensen et al., 2019) further emphasizes

336 the importance of ER membrane integrity to maintain the ER as a robust folding  
337 compartment in general. Most of the candidates, however, are linked to protein quality  
338 control as components of stress related pathways such as *slh1Δ*, *ptc1Δ* and *sic1Δ* that  
339 encode functional components of the HOG pathway as well as *oca1Δ* and *oca2Δ* that  
340 are involved in oxidative stress. Basal activity of the HOG pathway was shown to  
341 contribute to UPR induced accumulation of glycerol and thereby mediates resistance  
342 towards the ER stress inducing agent tunicamycin in *S. cerevisiae* (Torres-Quiroz,  
343 Garcia-Marques, Coria, Randez-Gil, & Prieto, 2010). Osmolytes such as glycerol are  
344 often referred to as “chemical chaperones” and have been shown to increase protein  
345 stability and restore ER homeostasis (Burg & Ferraris, 2008). Increased fluorescence  
346 of ER-GFP in *oca1Δ* and *oca2Δ* mutants might be explained by the recent finding that  
347 yeast UPR is inhibited by oxidative stress (Guerra-Moreno, Ang, Welsch, Jochem, &  
348 Hanna, 2019). With important components of the oxidative stress response missing  
349 yeast UPR could be more efficient in folding of the UPOM-reporter. However, general  
350 activation of UPR such as in *erj5Δ* (Carla Fama et al., 2007) and *erv25Δ* (Copic et al.,  
351 2009) or *hrd1Δ* mutants where ERAD is affected (Bays, Gardner, Seelig, Joazeiro, &  
352 Hampton, 2001), do not impact on ER-GFP folding (Xu et al., 2013) (Suppl. Table S1),  
353 suggesting a more specific role of stress related UPR for proper reporter folding.  
354 Our screening further revealed unexpected links between ER-GFP, *per se* a non N-  
355 glycosylated protein, and N-glycosylation such as *cwh41Δ* and *ost3Δ* (Suppl. Table  
356 S1). *CWH41* encodes for α-glucosidase I that is responsible for trimming of the  
357 outermost glucose of N-glycans within the calnexin-calreticulin cycle thereby creating  
358 a time window before Mns1 and Htm1 mannosidases target the protein for degradation  
359 (Kostova & Wolf, 2003). Ost3 is one out of nine subunits of the yeast OST complex  
360 that together with Ost6 determines functionally distinct OST complexes (Schwarz,  
361 Knauer, & Lehle, 2005). Ost3 was recently reported to be necessary for N-  
362 glycosylation of Pmt2 (Zatorska et al., 2017) but no direct evidence of impaired Pmt2  
363 enzymatic activity was obtained *in vivo*. However, ER-GFP oligomers that are  
364 indicative of ER-GFP misfolding (Xu et al., 2013) were significantly reduced in *ost3Δ*  
365 cells suggesting more efficient folding in the absence of Ost3 (Suppl. Fig. 2C).  
366 In addition to Pmt1 and Pmt2, the strongest factors identified in the screen directly  
367 affecting O-mannosylation of ER-GFP are Psa1 and Bfr1 (Fig. 2B).  
368 Psa1 catalyzes biosynthesis of GDP-mannose, the common sugar donor for Dol-P-  
369 Man production. Intriguingly, a second enzyme that contributes to GDP-mannose

370 synthesis, the glucose-6-phosphate isomerase Pgi1 (Suppl. Fig. 3B), is found at  
371 immediate proximity to the screening threshold (Suppl. Table S1) suggesting that  
372 GDP-mannose availability might indeed be important for PMT activity. That  
373 carbohydrate donor levels affect PMT activity has been also suggested in studies  
374 performed in *S. cerevisiae* (Janik et al., 2003) and *Trichoderma reesei* (Zakrzewska et  
375 al., 2003) in which manipulation of GDP-mannose levels affects glycosylation. These  
376 preliminary data suggest a so far unknown link between carbohydrate metabolism and  
377 UPOM.

378 Bfr1 regulates Pmt1 and Pmt2 translation and therefore impacts on UPOM. Bfr1 is a  
379 cytoplasmic protein without any common RNA interacting motifs that was described as  
380 a component of polyribosome associated mRNP complexes in *S. cerevisiae* (Lang et  
381 al., 2001). Further, Bfr1 mediates localization of certain mRNAs to P-bodies (Simpson  
382 et al., 2014) and prevents P-body formation under normal conditions (Weidner et al.,  
383 2014) further supporting a function for Bfr1 in mRNA metabolism. P-bodies are  
384 dynamic ribonucleoprotein complexes where mRNA storage, translational repression  
385 or degradation occurs (Luo, Na, & Slavoff, 2018). Recent RNA binding studies that  
386 imply the presence of far more RNA binding domains than known to date (Albihlal &  
387 Gerber, 2018) in combination with multiple approaches that identify hundreds of  
388 different mRNAs interacting with Bfr1 (Hogan et al., 2008; Lapointe et al., 2015;  
389 Mitchell, Jain, She, & Parker, 2013) suggest a role for Bfr1 as an RNA binding protein  
390 and translational regulator itself.

391 In addition to Pmt1 and Pmt2, Bfr1 significantly affects active translation of all PMTs  
392 and of additional 322 genes from which nearly half show reduced translation in  
393 absence of Bfr1 (Fig. 7A; Suppl. Table S2). Among those we find the sterol reductase  
394 Erg4 that catalyzes the final step in ergosterol biosynthesis (Zweytick, Hrastnik,  
395 Kohlwein, & Daum, 2000) and that was recently described to be translationally  
396 regulated by Bfr1 (Manchalu, Mittal, Spang, & Jansen, 2019). We combined our data  
397 with Bfr1 interacting transcripts from Lapointe *et al.* (Lapointe et al., 2015) who reported  
398 Bfr1 targets to be highly enriched for mRNAs translated at the ER. In this “RNA  
399 Tagging” approach, Bfr1 interacting mRNAs were tagged with varying numbers of  
400 uridines by the poly(U) polymerase fused to Bfr1 depending on the strength of the  
401 interaction. Targets were classified into four groups based on the number of targeted  
402 RNAs and the length of the U-tag (class A encloses the strongest interactors). Crossing  
403 these datasets shows that Bfr1 controlled targets are enriched in classes A and B,

404 which contain the strongest and most reliable Bfr1 binders. Among class A secretory  
405 proteins are Pmt1-4 and Erg4, as well as the OST subunits Ost1, Ost5 and Stt3 that  
406 form one out of two subcomplexes during OST complex assembly (Mueller et al.,  
407 2015). Given that these subcomplexes are intermediates that protect subunits from  
408 degradation they might play a decisive role in dynamics of OST complex formation and  
409 N-glycosylation. In addition, class A secretory proteins harbor several components of  
410 ergosterol biosynthesis (Erg3, Erg4, Erg11 and Erg24) and two iron homeostasis  
411 genes (Ftr1 and Smf3). This finding is particularly intriguing given the importance of  
412 iron for ergosterol biosynthesis and for Ire1 clustering and UPR activation (N. Cohen  
413 et al., 2017). A summary of all classified targets is available in Suppl. Table S2.  
414 Although a more detailed analysis of strong Bfr1 binders will be necessary to define  
415 the biological impact of Bfr1 mediated translation, our data strongly suggest a function  
416 of Bfr1 as a local translation factor at the ER membrane.

417 How does cytoplasmic Bfr1 regulate translation at the ER membrane? Our data  
418 strongly suggest that Bfr1 is not a prerequisite for PMT transcript recruitment to the  
419 ER, in agreement with similar observations for the Bfr1 target Erg4 (Manchalu et al.,  
420 2019). For Bfr1 this suggests two possible scenarios: Bfr1 could be targeted to the ER  
421 membrane via bound mRNAs as suggested for Erg4 (Manchalu et al., 2019) or Bfr1  
422 could be associated with ER bound ribosomes before respective mRNAs reach the  
423 ER. It remains a challenging question for the future whether Bfr1 binds to mRNAs  
424 before or after their recruitment to the ER.

425 In a wider context our data together with transcriptomic data from others (Travers et  
426 al., 2000) reveal that ER stress is an important determinant of Pmt1-Pmt2 abundance  
427 (Fig. 3A, B; Fig. 4C) that is additionally controlled on a translational level by Bfr1 (Fig.  
428 7). Interestingly Bfr1 is also a target of the UPR (Suppl. Fig. 7; (Travers et al., 2000))  
429 suggesting that the function of Bfr1 is relevant to maintain protein homeostasis in the  
430 ER. Maximal Pmt1-Pmt2 expression depends on both, transcriptional activation of  
431 Pmt1-Pmt2 under cell stress conditions as well as elevated translation efficiency  
432 mediated by Bfr1. The fine-tuned coordination of Pmt1-Pmt2 protein abundance with  
433 ER stress further implies that O-mannosylation and protein folding must be balanced  
434 to ensure functionality of canonical target proteins and unfolded protein O-  
435 mannosylation, the latter being more sensitive to subtle changes of Pmt1-Pmt2 protein  
436 levels. Exactly adjusting Pmt1-Pmt2 activity to ER protein load most likely enables O-

437 mannosylation of highly diverse protein substrates without unintentionally interfering  
 438 with protein folding.

439

## 440 MATERIALS AND METHODS

### 441 Yeast Strains and Culture Conditions

442 *S. cerevisiae* strains used in this study are listed in Table 1. Strains derived from  
 443 genetic libraries are underlined.

444

445

**Table 1. *S. cerevisiae* strains**

| Strain                                   | Genotype                                                                                | Reference/Source                         |
|------------------------------------------|-----------------------------------------------------------------------------------------|------------------------------------------|
| <b>BY4741 (wild type)</b>                | <i>MATa met15-Δ0 his3-Δ1 leu2-Δ0 ura3-Δ0</i>                                            | (Brachmann et al., 1998)                 |
| <b>SEY6210</b>                           | <i>MATα lys2-801 his3-Δ200 leu2-3,112 trp1-Δ901 ura3-52 suc2-Δ9</i>                     | (Robinson, Klionsky, Banta, & Emr, 1988) |
| <b>YMS721</b>                            | <i>MATα his3Δ1 leu2Δ0 met15Δ0 ura3Δ0 can1Δ::STE2pr-spHIS5 lyp1Δ::STE3pr-LEU2</i>        | (Papic et al., 2013)                     |
| <b>JEY05</b>                             | YMS721 <i>hoΔ::ER-GFP<sub>r</sub>-URA3</i>                                              | This study                               |
| <b>JEY06</b>                             | YMS721 <i>hoΔ::ER-GFP-URA3</i>                                                          | This study                               |
| <b>JCY010</b>                            | JEY06 except <i>pmt1Δ::kanMX4</i>                                                       | This study                               |
| <b>JCY011</b>                            | JEY06 except <i>pmt2Δ::kanMX4</i>                                                       | This study                               |
| <b>JCY012</b>                            | JEY06 except <i>pmt4Δ::kanMX4</i>                                                       | This study                               |
| <b><u>bfr1Δ</u></b>                      | BY4741 except <i>bfr1Δ::kanMX4</i>                                                      | Euroscarf                                |
| <b><u>psa1<sup>DAmp</sup> ER-GFP</u></b> | JEY06 except <i>psa1Δ::psa1<sup>DAmp</sup></i>                                          | This study                               |
| <b><u>bfr1Δ ER-GFP</u></b>               | JEY06 except <i>bfr1Δ::kanMX4</i>                                                       | This study                               |
| <b><u>spf1Δ ER-GFP</u></b>               | JEY06 except <i>spf1Δ::kanMX4</i>                                                       | This study                               |
| <b>JCY015</b>                            | BY4741 except <i>psa1Δ::psa1<sup>DAmp</sup></i>                                         | This study                               |
| <b>JCY016</b>                            | JEY06 except <i>bfr1Δ::kanMX4</i>                                                       | This study                               |
| <b>JCY017</b>                            | BY4741 except <i>bfr1Δ::BFR1-3xHA</i>                                                   | This study                               |
| <b>MLY014</b>                            | SEY6210 except <i>PMT2-GAGA-HA<sub>3</sub>-kanMX6</i>                                   | M. Loibl (unpublished)                   |
| <b>MLY098</b>                            | SEY6210 except <i>kITRP1-P<sub>GAL1</sub>-UBI4-R-PMT2-GAGA-HA<sub>3</sub>-kanMX6-HA</i> | M. Loibl (unpublished)                   |
| <b>JCY034</b>                            | MLY098 except <i>bfr1Δ::URA3</i>                                                        | This study                               |

|                            |                                             |                              |
|----------------------------|---------------------------------------------|------------------------------|
| <b>EZY70</b>               | BY4741 except <i>hoΔ::ER-GFP-URA3</i>       | E. Zatorska<br>(unpublished) |
| <b>EZY77</b>               | <i>ost3Δ</i> except <i>hoΔ::ER-GFP-URA3</i> | E. Zatorska<br>(unpublished) |
| <b>EZY78</b>               | <i>ost6Δ</i> except <i>hoΔ::ER-GFP-URA3</i> | E. Zatorska<br>(unpublished) |
| <b><i>pmt2Δ</i> ER-GFP</b> | <i>pmt2Δ</i> except <i>hoΔ::ER-GFP-URA3</i> | This study                   |

446

447 Yeast cultures were grown in yeast extract-peptone-dextrose (YPD) or synthetic  
448 defined (SD) medium at 30°C. For auxotrophic selection corresponding amino acids  
449 were excluded from SD medium. For antibiotic-based selection cultures were  
450 supplemented with 400 µg/mL geneticin (#11811-031; Invitrogen; Waltham, MA, USA)  
451 or 100 mg/L nourseothricin (#96736-11-7; Werner BioAgents; Jena-Cospeda,  
452 Germany).

453

#### 454 **Plasmids and Oligonucleotides**

455 Plasmids used in this study are listed in Table 2. Sequences of oligonucleotides are  
456 available on request.

457

458

**Table 2. Plasmids**

459

| Plasmid       | Description                                                                                  | Reference/Source            |
|---------------|----------------------------------------------------------------------------------------------|-----------------------------|
| <b>pPN014</b> | ori, CEN/ARS, $P_{TDH3}$ - <i>ER-GFP-3xFLAG-HDEL</i>                                         | P. Neubert<br>(unpublished) |
| <b>pWX204</b> | ori, CEN/ARS, $P_{TDH3}$ - <i>Kar2<sub>SS</sub>-ER-GFP<sub>r</sub>-HDEL</i> ,<br><i>URA3</i> | (Xu et al., 2013)           |
| <b>pWX206</b> | ori, CEN/ARS, $P_{TDH3}$ - <i>Kar2<sub>SS</sub>-ER-GFP-HDEL</i> ,<br><i>URA3</i>             | (Xu et al., 2013)           |
| <b>pJC01</b>  | ori, bla, 2µ, <i>PMT2</i> , <i>LEU2</i>                                                      | This study                  |
| <b>pJC02</b>  | ori, bla, 2µ, <i>PMT2-3xHA</i> , <i>HIS3</i>                                                 | This study                  |
| <b>pRS41N</b> | ori, CEN/ARS, <i>natNT2</i>                                                                  | (Taxis & Knop,<br>2006)     |
| <b>pJC09</b>  | ori, CEN/ARS, <i>PMT2</i> , <i>natNT2</i>                                                    | This study                  |
| <b>pJC10</b>  | ori, CEN/ARS, <i>PMT2-3xHA</i> , <i>natNT2</i>                                               | This study                  |

|               |                                                                           |                                                        |
|---------------|---------------------------------------------------------------------------|--------------------------------------------------------|
| <b>pRS415</b> | ori, CEN/ARS, bla, <i>LEU2</i>                                            | (Christianson, Sikorski, Dante, Shero, & Hieter, 1992) |
| <b>pJC16</b>  | ori, CEN/ARS, <i>P<sub>TDH3</sub>-Kar2<sub>SS</sub>-ER-GFP-HDEL, LEU2</i> | This study                                             |
| <b>pUG6</b>   | ori, bla, <i>kanMX4</i>                                                   | (Guldener, Heck, Fielder, Beinhauer, & Hegemann, 1996) |
| <b>pJH24</b>  | ori, bla, 2 $\mu$ , <i>URA3, kanMX6</i>                                   | (Hutzler, Gerstl, Lommel, & Strahl, 2008)              |

---

460

461 To construct plasmid pJC09 for Pmt2 expression the *Sall/PstI* *PMT2* fragment from  
462 pVG76 (Girrbach & Strahl, 2003) was cloned into pRS425 resulting in pJC01 and the  
463 *Apal/SpeI* *PMT2* fragment from pJC01 was cloned into pRS41N. To construct plasmid  
464 pJC10 for Pmt2-3xHA expression the *Sall/SmaI* *PMT2-3xHA* fragment from pEZ43  
465 was cloned into pRS423 resulting in pJC02 and the *Apal/SpeI* *PMT2-3xHA* fragment  
466 from pJC02 was cloned into pRS41N. To construct pJC16 for Kar2<sub>SS</sub>-ER-GFP-HDEL  
467 expression the *NotI/Sall* *Kar2<sub>SS</sub>-ER-GFP-HDEL* fragment from pWX206 was  
468 subcloned into pRS415.

469

## 470 **ER-GFP Screening**

### 471 Automated Library Generation

472 Query strain JEY06 expressing ER-GFP was constructed on the synthetic genetic  
473 array compatible strain YMS721 (Papic et al., 2013) and was integrated into yeast  
474 deletion (Giaever et al., 2002) and DAmP libraries (Breslow et al., 2008) following  
475 synthetic genetic array methodology (Y. Cohen & Schuldiner, 2011; Tong & Boone,  
476 2006). Mating was performed on 1536-colony format YPD plates using a RoToR bench  
477 top colony arrayer (Singer Instruments; Somerset, UK). Resulting diploids were  
478 selected for deletion/DAmP libraries and ER-GFP markers *KanR* and *URA3*,  
479 respectively. Sporulation was induced by transferring cells to nitrogen starvation media  
480 for seven days and haploid cells were selected in histidine deficient SD plates to select  
481 for spores with an A mating type using canavanine and thialysine (Sigma-Aldrich)  
482 against remaining diploids alongside with previously mentioned selection markers.



### 483 High-throughput Microscopy

484 Microscopy screening was performed using an automated fluorescence microscopy  
485 setup as previously described (Breker, Gymrek, & Schuldiner, 2013). Cells were  
486 transferred from agar plates into liquid 384-well polystyrene growth plates using the  
487 RoToR arrayer. Liquid cultures were grown over night at 30°C in SD medium in a  
488 shacking incubator (LiCONiC Instruments; Liechtenstein). A JANUS liquid handler  
489 (PerkinElmer; Waltham, MA, USA) connected to the incubator was used to dilute the  
490 strains to an OD<sub>600</sub> of approximately 0.2 into plates containing the same medium.  
491 Plates were incubated at 30°C for 4 h for cells to reach the logarithmic growth phase.  
492 Cultures were then transferred by the liquid handler into glass-bottom 384-well  
493 microscope plates (Matrical Bioscience; Spokane, WA, USA) coated with  
494 Concanavalin A (Sigma-Aldrich). After 20 minutes, wells were washed twice with SD-  
495 Riboflavin complete medium to remove non-adherent cells and to obtain a cell  
496 monolayer. Plates were then transferred to the ScanR automated inverted fluorescent  
497 microscope system (Olympus; Shinjuku, Japan) using a swap robotic arm (Hamilton;  
498 Bonaduz, Switzerland). Images of cells in 384-well plates were recorded in SD-  
499 Riboflavin complete medium at 24°C at GFP (excitation at 490/20 nm, emission at  
500 535/50 nm) channel using a 60x air lens (NA=0.9) and with an ORCA-ER charge-  
501 coupled device camera (Hamamatsu; Shizuoka, Japan).

### 502 Image Analysis

503 Analysis of ER-GFP intensity was performed using the Olympus ScanR analysis  
504 software. Images were preprocessed by background subtraction and segmentation  
505 was done with the brightfield images and a series of shape conditions were applied as  
506 filters. The median GFP intensity for each strain was measured from the remaining  
507 objects for each strain. Dead cells appeared as high fluorescent outlier values and  
508 were removed with the ScanR software in an automated manner. Strains with  
509 insufficient number of detected objects (<25) as well as contaminated strains were  
510 removed from the analysis.

511

### 512 **Real-time Quantitative Polymerase Chain Reaction (RT-qPCR)**

#### 513 Total RNA Isolation

514 For total RNA isolation cells were grown to mid-log phase at 30°C. Ice-cold NaN<sub>3</sub> was  
515 added to the culture to a final concentration of 100-200 mM and 5 OD<sub>600</sub> units were  
516 harvested by centrifugation for 5 min at 3,000 g. Total RNA was isolated using the

517 Universal RNA Purification Kit (Roboklon; Berlin, Germany) according to  
518 manufacturer's instructions. For spheroplast generation prior to lysis lyticase (#L2524  
519 Sigma-Aldrich Chemie; Munich, Germany) was added to the corresponding buffer.  
520 When indicated during the protocol RNase-free DNase (#M6101, Promega; Madison,  
521 WI, USA) was added to the RNA binding columns and incubated at RT for 10 min. For  
522 representative sets of samples RNA integrity was verified by agarose gel  
523 electrophoresis.

#### 524 cDNA Synthesis

525 Two µg of total RNA were reverse transcribed into cDNA using the RevertAid First  
526 Strand cDNA Synthesis Kit (#K1622, Thermo Fisher Scientific, Bonn, Germany) with  
527 Oligo(dT)18 primers following manufacturer's instructions.

#### 528 Real-time Quantitative Polymerase Chain Reaction (RT-qPCR)

529 RT-qPCR was performed on the Rotor-Gene Q (Qiagen) using the qPCRBIO SyGreen  
530 Mix Lo-ROX (#PB20.11, PCR Biosystems, London, UK). PCR reactions were  
531 performed in a final volume of 12.5 µl containing x µl of 1:20 cDNA dilution and 0.4 mM  
532 of respective oligonucleotides. As technical replicates and for determination of RT-  
533 qPCR efficiency 1:100 and 1:1000 cDNA dilutions were included. Only RT-PCR  
534 reactions with efficiencies ranging from 0.9 to 1.1 were further analyzed. For  
535 calculation of either relative gene expression or fold-change in gene expression, both  
536 standard curve-based and  $2^{-\Delta\Delta C_t}$  methods were used. Statistical analysis was  
537 performed on three independent biological replicates. Statistical significance was  
538 assessed as individually stated.

539

#### 540 **Preparation of Cell Extracts and Membranes**

541 For cell extract preparation cells were grown to mid-log phase at 30°C. For end-point  
542 analyses or time course experiments ice-cold NaN<sub>3</sub> was added to the culture to a final  
543 concentration of 100-200 mM and 10 or 20 OD<sub>600</sub> units were harvested by  
544 centrifugation for 5 min at 3,000 g. Cells were washed and resuspended in 50 or 100  
545 µl breaking buffer (50 mM Tris-HCl pH 7.4, 5 mM MgCl<sub>2</sub>) supplemented with protease  
546 inhibitors (1 mM PMSF, 1 mM benzamidine, 0.25 mM 1-chloro-3-tosylamido-7-amino-  
547 2-heptanone, 50 µg/mL l-1-tosylamido-2-phenylethyl chloromethyl ketone, 10 µg/mL  
548 antipain, 1 µg/mL leupeptin and 1 µg/mL pepstatin). Cell suspension was transferred  
549 to a tube with glass beads (ø 0.25-0.5 mm, #A553.1, Roth; Karlsruhe, Germany) and  
550 cells were subjected to mechanic lysis using the Hybaid RiboLyser (Thermo Fisher

551 Scientific; Bonn, Germany) in four rounds of 25 s at 4.5 speed level. For cell extract  
552 preparation cell debris was pelleted by centrifugation for 5 min at 1,500 g. For  
553 membrane preparation total cell extracts were centrifuged for 1 h at 20,000 g.  
554 Membrane pellets were resuspended with a 0.3 mm syringe in equivalent volume of  
555 membrane buffer (20 mM Tris-HCl pH 8.0, 10 mM EDTA pH 8.0, 15% (v/v) glycerol)  
556 supplemented with protease inhibitors.

557

### 558 **Flag-tag Immunoprecipitation**

559 For immunoprecipitation 20 OD<sub>600</sub> units of cells grown to mid-log phase were subjected  
560 to membrane preparation with the following modifications: 1. Total cell extracts were  
561 centrifuged for 30 min at maximum speed (approximately 30,000 g). 2. Membrane  
562 buffer was supplemented with 1% Triton X-100 and samples were placed on a rotator  
563 mixer for 10 min at RT. 3. Samples were diluted 1:4 in TBS supplemented with 1mM  
564 PMSF and centrifuged for 15 min at 20,000 g to remove insoluble material. For Flag-  
565 tag immunoprecipitation samples were incubated with 100 µl of anti-FLAG M2  
566 magnetic beads (#M8823, Sigma-Aldrich Chemie; Munich, Germany) for 4 h at 4°C.  
567 The bound fraction was eluted by addition of FLAG peptide to a final concentration of  
568 0.3 µg/µl and further rotation for 1 h at 4°C. Demannosylation of ER-GFP was  
569 performed with α1-2,3,6 mannosidase (#9025-42-7, Sigma-Aldrich Chemie; Munich,  
570 Germany) according to manufacturer's instructions.

571

### 572 **Cycloheximide Chase Experiments**

573 Cells were grown under standard conditions in YPD medium and were initially sampled  
574 for time point zero. Cycloheximide was immediately added to a final concentration of  
575 100 to 200 µM and equal amounts of cells were sampled at indicated time points.  
576 Sampled cells were treated with NaN<sub>3</sub> to a final concentration of 20 mM to stop the  
577 chase and were kept on ice until the last sample was collected. Total cell extracts were  
578 analyzed via Western blot.

579

### 580 **Western Blot Analysis**

581 Protein samples were denatured in 1x SDS-sample buffer for 10 min at 70°C and  
582 resolved in 12% sodium dodecyl sulfate polyacrylamide (SDS PAA) gels. Proteins  
583 were transferred to nitrocellulose membranes and visualized by enhanced  
584 chemiluminescence using ECL Prime Western Blotting Detection Reagent

585 (#RPN2232, GE Healthcare; Chicago, IL, USA) and imager ImageQuant LAS 4000  
 586 (GE Healthcare; Chicago, IL, USA). Primary and secondary antibodies used in this  
 587 study are summarized in Table 3.

588

589

590

**Table 3. Antibodies**

| <b>Name</b>                    | <b>Description</b> | <b>Reference/Source</b>                                      |
|--------------------------------|--------------------|--------------------------------------------------------------|
| $\alpha$ Pmt1                  | rabbit; 1:2,500    | (Strahl-Bolsinger & Tanner, 1991)                            |
| $\alpha$ Pmt2                  | rabbit; 1:2,500    | (Gentzsch, Immervoll, & Tanner, 1995)                        |
| $\alpha$ Pmt4                  | rabbit; 1:250      | (Girrbach & Strahl, 2003)                                    |
| $\alpha$ Sec61                 | rabbit; 1:2,500    | (Stirling, Rothblatt, Hosobuchi, Deshaies, & Schekman, 1992) |
| $\alpha$ HA                    | mouse; 1:10,000    | #MMS-101R; Covance; Princeton, NJ, USA                       |
| $\alpha$ Gas1                  | rabbit; 1:2,500    | (Popolo, Grandori, Vai, Lacana, & Alberghina, 1988)          |
| $\alpha$ Wbp1                  | rabbit; 1:2,500    | (te Heesen, Knauer, Lehle, & Aebi, 1993)                     |
| $\alpha$ Kar2                  | rabbit; 1:500      |                                                              |
| $\alpha$ Ost3                  | rabbit; 1:1,000    | Gift from M. Aebi                                            |
| $\alpha$ G6PDH                 | rabbit; 1:5,000    | #A9521; Sigma-Aldrich Chemie; Munich, Germany                |
| $\alpha$ GFP                   | rabbit; 1:2,500    | #A6455; Thermo Fisher Scientific; Waltham, MA, USA           |
| $\alpha$ Rpl5                  | rabbit; 1:7,000    | Gift from E. Hurt                                            |
| $\alpha$ mouse <sup>HRP</sup>  | rabbit; 1:10,000   | #A9044; Sigma-Aldrich; Munich, Germany                       |
| $\alpha$ rabbit <sup>HRP</sup> | goat; 1:10,000     | #A6154; Sigma-Aldrich; Munich, Germany                       |

591

### 592 **Cell Fractionation coupled to RNA preparation**

593 Both methods are adapted from (Aronov et al., 2015) and (Kraut-Cohen et al., 2013).

### 594 Cell Fractionation by One Step Ultracentrifugation

595 Cells grown to mid-log phase were treated with 100  $\mu$ g/ml cycloheximide for 15 min  
 596 before harvest. Cells equivalent to 20 OD<sub>600</sub> units were harvested by centrifugation for  
 597 5 min at 3,000 g, washed with ice-cold SK buffer (1.2 M sorbitol, 0.1 M KPO<sub>4</sub> pH 7.5,  
 598 100  $\mu$ g/ml cycloheximide) and incubated for 5 min on ice. Cells were pelleted by  
 599 centrifugation for 3 min at 500 g and were resuspended in 250  $\mu$ l BRS buffer (50 mM

600 Tris-HCl pH 7.6, 150 mM NaCl, 250 mM sorbitol, 30 mM MgCl<sub>2</sub>, 100 µg/ml  
601 cycloheximide, 200 U/ml RNasin ribonuclease inhibitor (#N2511, Promega; Madison,  
602 WI, USA)) supplemented with protease inhibitors as described for preparation of cell  
603 extracts and membranes. Mechanical lysis was performed with glass beads using the  
604 Hybaid RiboLyser in five rounds of 35 s at 4.5 speed level. For cell extract preparation  
605 cell debris was pelleted by centrifugation for 10 min at 1,000 g. 200 µl of cell extract  
606 were fractionated by ultracentrifugation at 48,000 g resulting in a soluble fraction and  
607 a membrane pellet. Membrane pellets were resuspended in 400-500 µl BMRS buffer  
608 (BRS buffer with 80 U/ml RNasin ribonuclease inhibitor) with a 0.3 mm syringe and  
609 ultracentrifugation was repeated. Total RNA was prepared from 100 µl of soluble and  
610 membrane fractions using the Universal RNA Purification Kit (Roboklon; Berlin,  
611 Germany) according to manufacturer's instructions.

#### 612 Cell Fractionation by Sucrose Step Gradient Centrifugation

613 Mid-log phase grown cells equivalent to 300 OD<sub>600</sub> units were harvested by  
614 centrifugation for 5 min at 3,000 g, washed with ice-cold SK buffer and incubated for 5  
615 min on ice. Cells were pelleted by centrifugation for 5 min at 2,500 g and were  
616 resuspended in 1.2 ml lysis buffer (10 mM Tris-HCl pH 7.5, 0.25 M sucrose, 30 mM  
617 MgCl<sub>2</sub>, 1 mM DTT, 100 µg/ml cycloheximide, 200 U/ml RNasin ribonuclease inhibitor)  
618 supplemented with protease inhibitors as described for preparation of cell extracts and  
619 membranes. Mechanical lysis was performed with glass beads using the Hybaid  
620 RiboLyser in four rounds of 45 s at 4.5 speed level. For cell extract preparation cell  
621 debris was pelleted by centrifugation for 10 min at 1,000 g. 900 µl of cell extract were  
622 diluted with lysis buffer to 2 ml final volume. For preparation of a discontinuous sucrose  
623 gradient 3 ml of a 1.5 M and 1.2 M sucrose buffer were added on top of a 2 M sucrose  
624 cushion. Total cell extract was loaded on top of the gradient and centrifugation was  
625 performed for 2.5 h at 232,000 g. The gradient was manually fractionated in 0.5 ml  
626 fractions and protein content of selected fractions was analyzed by SDS-PAGE. Total  
627 RNA was prepared from 300 µl of selected fractions using the Universal RNA  
628 Purification Kit (Roboklon; Berlin, Germany) according to manufacturer's instructions.  
629 Semi-quantitative PCR was performed using the DreamTaq Green PCR master mix  
630 (#K1081, Thermo Fisher Scientific) according to manufacturer's instructions. PCR was  
631 performed with 1 µl of a 1:20 dilution of cDNA in 23 or 25 cycles with a final primer  
632 concentration of 0.5 µM in a 20 µl reaction.

633

## 634 **Flow Cytometry**

635 Cells expressing ER-GFP were grown to mid-log phase in the corresponding medium  
636 at 30°C. FACS analysis of 20,000 cells was performed using the cell analyzer BD  
637 FACSCanto™ (BD Biosciences; Heidelberg, Germany) in collaboration with the Flow  
638 Cytometry & FACS Core Facility (ZMBH, Heidelberg University; Heidelberg,  
639 Germany).

640

## 641 **Fluorescence Microscopy**

642 Cells expressing ER-GFP were grown to mid-log phase in the corresponding medium  
643 at 30°C and microscopy was performed on standard glass plates using an LSM510-  
644 META confocal laser scanning microscope (Carl Zeiss; Jena, Germany) with x100 or  
645 x40 Plan Aplanachromat objectives. GFP signal (excitation 488 nm, Ar<sup>+</sup> laser) was  
646 detected by using a bandpass emission filter for 505–530 nm.

647

## 648 **Ribosome Profiling**

### 649 Sample Preparation

650 Wild type and *bfr1Δ* cells were grown to mid-log phase at 30°C and approximately 150  
651 OD<sub>600</sub> units were harvested using rapid filtration and flash freezing in liquid nitrogen.  
652 Frozen cell pellets were mixed with 750 μl of frozen lysis buffer droplets (20 mM Tris-  
653 HCl pH 8, 140 mM KCl, 10 mM MgCl<sub>2</sub>, 20% (v/v) NP-40, 100 μg/ml cycloheximide, 1x  
654 EDTA-free protease inhibitor cocktail (Roche; Basel, Switzerland), 0.02 U/μl DNase I  
655 (Roche; Basel, Switzerland), 40 μg/ml bestatin) and a metal ball in pre-chilled metal  
656 jars and lysed by mixer milling 2 min at 30 Hz (MM400, Retsch; Haan, Germany). Cell  
657 lysates were thawed in a 30°C water bath, transferred to low binding tubes and RNA  
658 concentration was determined by Nanodrop. Lysates were next subjected to RNase I  
659 digestion (10 U of RNase I per Abs<sub>260</sub> unit) for 30 min at 4°C, the reaction was stopped  
660 by adding 10 μl of SUPERase-In RNase inhibitor (#LSAM2694, Invitrogen; Waltham,  
661 MA, USA) and lysates were cleared by 5 min centrifugation at 20,000 x g<sub>av</sub>.

662 Total ribosomes were collected by sucrose cushion centrifugation. Maximum of 400 μl  
663 of cleared lysate were loaded onto 800 μl of sucrose cushion buffer (20 mM Tris-HCl  
664 pH 8, 140 mM KCl, 10 mM MgCl<sub>2</sub>, 100 μg/ml cycloheximide, 1x EDTA-free protease  
665 inhibitor cocktail (Roche; Basel, Switzerland), 25% (v/v) sucrose) in sucrose cushion  
666 tubes and centrifuged for 90 min at 75,000 rpm and 4°C in a TLA120-rotor (Beckman;

667 Indianapolis, IN, USA). Pellets were resuspended in lysis buffer by continuous agitation  
668 at 4°C and transferred to non-stick tubes.

#### 669 Ribosome-protected Footprint mRNA Extraction

670 mRNA footprints were extracted from processed samples by phenol-chloroform  
671 extraction. In brief, ribosome pellets were brought to a final volume of 700 µl with lysis  
672 buffer and mixed with 40 µl 20% (v/v) SDS to precipitate the protein content. 750 µl of  
673 pre-warmed (65°C) acid phenol was added and samples were incubated for 5 min at  
674 65°C and 1,400 rpm shaking; and chilled for 5 min on ice. Next, samples were  
675 centrifuged for 2 min at 20,000 x  $g_{av}$  and the aqueous phase was transferred to a new  
676 tube. 700 µl of hot phenol were again added and samples were incubated 5 min at  
677 room temperature with occasional vortexing. 600 µl of chloroform were added and  
678 mixed by vortexing. Samples were centrifuged for 1 min at 20,000 x  $g_{av}$  and the  
679 aqueous phase was transferred to a new tube. To precipitate nucleic acids, ~ 650 µl  
680 of the sample were mixed with 1:9 equivalence volume of 3 M NaOAc pH 5.5, 1  
681 equivalence volume of isopropanol and 2 µl of Glycoblue, mixed by vortexing and  
682 chilled overnight at -80°C.

683 Next, RNA samples were centrifuged for 2 h at 20,000 x  $g_{av}$  and 4°C and the pellet  
684 was washed with 750 µl ice-cold 70% ethanol. Centrifugation was repeated for 2 min  
685 and the pellet was dried for 2 min at 65°C. Pellets were finally resuspended in 20-50  
686 µl of 10 mM Tris-HCl pH 7.

687 RNA enrichment was verified by Bioanalyzer RNA Nanochip (Agilent) and total RNA  
688 concentration was determined by Nanodrop after diluting RNA samples in water and  
689 10 mM Tris-HCl pH 7, respectively.

#### 690 Deep Sequencing Library Preparation

691 Total transcriptome analysis was performed according to (Doring et al., 2017) with some  
692 modifications. RNA samples were heated at 80°C for 2 min and 40-50 mg of RNA were  
693 loaded onto 15% TBE-Urea polyacrylamide gels (Invitrogen; Waltham, MA, USA) in 1x  
694 TBE (Ambion) and run for 65 min at 200 V. Gels were stained for 20 min with SYBR  
695 gold (Invitrogen) and ribosome footprints were recovered from the gels by excising  
696 sections of 21 to 33 nucleotide size. Gel pieces were placed into 0.5 ml gel breaker  
697 tubes and centrifuged for 3 min at 20,000 x  $g_{av}$ . Remaining pieces were transferred to  
698 a fresh 1.5 ml tube, resuspended with 10 mM Tris-HCl pH 7 and incubated for 15 min  
699 at 70°C in a thermomixer with maximum shaking. The gel slurry was then transferred  
700 to a Spin-X cellulose acetate column (#60702, Thermo Fisher Scientific; Waltham, MA,

701 USA) and centrifuged for 3 min at 20,000 x  $g_{av}$ . Flow through was transferred to a fresh  
702 pre-cooled non-stick tube on ice. Nucleic acids samples were precipitated as described  
703 in the latter section. Next, RNA samples were centrifuged for 2 h at 20,000 x  $g_{av}$  and  
704 4°C and the pellet was washed with 750  $\mu$ l ice-cold 70% ethanol. Centrifugation was  
705 repeated for 2 min and the pellet was dried for 2 min at 65°C. Pellets were finally  
706 resuspended in 15  $\mu$ l of 10 mM Tris-HCl pH 7 and transferred to a fresh non-stick tube.  
707 *To dephosphorylate 3' ends of ribosome footprints*, a master mix was prepared  
708 containing 2  $\mu$ l 10x T4 polynucleotide kinase buffer without ATP (NEB) and 1  $\mu$ l murine  
709 RNase inhibitor per sample and 3  $\mu$ l were added to each sample together with 2  $\mu$ l  
710 truncated T4 polynucleotide kinase (#M0201, NEB; Frankfurt/Main, Germany).  
711 Samples were incubated for 2 h at 37°C and the enzyme was deactivated after the  
712 reaction by 10 min incubation at 75°C. At this point, nucleic acids were again  
713 precipitated as previously indicated. Samples were centrifuged for 1 h at 20,000 x  $g_{av}$   
714 and 4°C and RNA pellets were washed with 70% ethanol and resuspended in 15  $\mu$ l of  
715 10 mM Tris-HCl pH 7 and transferred to a fresh non-stick tube as previously indicated.  
716 RNA concentration was measured by Bioanalyzer RNA Nanochip (Agilent) and by  
717 nanodrop after diluting RNA samples in water and 10 mM Tris-HCl pH 7, respectively.  
718 *For 3' L1 linker ligation*, samples were diluted to a final RNA concentration of 10 pmol  
719 in 10  $\mu$ l of 10 mM Tris-HCl pH 7 and denatured for 2 min at 80°C. A master mix was  
720 prepared containing 16  $\mu$ l 50% sterile filtered PEG MW 8000, 4  $\mu$ l DMSO, 4  $\mu$ l 10x T4  
721 RNA Ligase 2 buffer and 2  $\mu$ l murine RNase inhibitor. Master mix was added to each  
722 sample together with 1  $\mu$ l truncated T4 RNA Ligase 2 (#M0239, NEB; Frankfurt/Main,  
723 Germany). Ligation was carried out for 2 h at 23°C and nucleic acids were precipitated,  
724 RNA pellets were washed with 70% ethanol as previously indicated and resuspended  
725 in 6  $\mu$ l of 10 mM Tris-HCl pH 7. 3'-linked footprints were denatured at 80°C for 2 min  
726 and purified on 10% TBE-Urea polyacrylamide gels (Invitrogen) in 1x TBE (Ambion)  
727 run for 50 min at 200 V. Gels were stained for 20 min with SYBR gold (Invitrogen) and  
728 3'-linked footprints were recovered from the gels by excising sections of 64 nucleotide  
729 size (footprint + L1). Similar to the previous in-gel purification, gel pieces were placed  
730 into 0.5 ml gel breaker tubes and centrifuged for 5 min at 20,000 x  $g_{av}$ . Remaining  
731 pieces were transferred to a fresh 1.5 ml tube, resuspended with 10 mM Tris-HCl pH  
732 7 and incubated for 15 min at 70°C in a thermomixer with maximum shaking. The gel  
733 slurry was then transferred to a Spin-X cellulose acetate column (#60702, Thermo  
734 Fisher Scientific; Waltham, MA, USA) and centrifuged for 3 min at 20,000 x  $g_{av}$ . Flow



735 through was transferred to a fresh pre-cooled non-stick tube on ice, nucleic acids were  
736 precipitated, RNA pellets washed with 70% ethanol as previously indicated and  
737 resuspended in 6  $\mu$ l of 10 mM Tris-HCl pH 7.

738 *To generate ssDNA 3'-linked footprint fragments were reverse transcribed. A master*  
739 *mix containing 1  $\mu$ l 10 mM dNTP mix, 1  $\mu$ l 25  $\mu$ M Linker L1 'L20 and 1.5  $\mu$ l DEPC H<sub>2</sub>O*  
740 *was prepared and added to the samples. Samples were incubated for 5 min at 65°C*  
741 *and 4 ml 5x FSB buffer (Invitrogen), 1 ml murine RNase inhibitor, 1 ml 0.1 M DTT*  
742 *(Invitrogen) and 1 ml Superscript III (Invitrogen) were added. Reverse transcription*  
743 *was performed for 30 min at 50°C and the reaction was quenched by adding 2.3 ml 1*  
744 *N NaOH and further incubating for 15 min at 95°C. Samples were denatured for 2 min*  
745 *at 70°C and run on a 10% TBE-Urea polyacrylamide gel for 70 min at 200 V. Gels were*  
746 *stained as described before, desired bands were excised and nucleic acids were*  
747 *extracted as mentioned earlier except remaining gel pieces were mixed with 0.5 ml 10*  
748 *mM Tris-HCl pH 8. Nucleic acids were precipitated by adding 1:16 equivalence volume*  
749 *of 5 M NaCl and 1:500 equivalence volume of 0.5 M EDTA together with 1 equivalence*  
750 *volume of isopropanol and 2  $\mu$ l of Glycoblue. Precipitation was performed at -20°C*  
751 *overnight and pellets were washed with 70% ethanol and resuspended in 15  $\mu$ l 10 mM*  
752 *Tris-HCl pH 8 as previously described.*

753 *To circularize ssDNA a master mix containing 2  $\mu$ l 10x Circligase buffer, 1  $\mu$ l 1 mM*  
754 *ATP, 1  $\mu$ l 50 mM MnCl<sub>2</sub> was added to the samples together with 1  $\mu$ l Circligase*  
755 *(EPICENTRE). Reaction was carried out for 1h at 60°C and the enzyme was*  
756 *inactivated by further incubation for 10 min at 80°C. 1  $\mu$ l of circularized ssDNA was*  
757 *used as a template for 4 technical replicates of Phusion-based PCR using the following*  
758 *mix and PCR program: PCR mix (62.6  $\mu$ l DEPC H<sub>2</sub>O, 16.7  $\mu$ l 5x HF buffer, 1.7  $\mu$ l 10*  
759 *mM dNTPs, 0.4  $\mu$ l 100 mM barcoding primer, 0.4  $\mu$ l 100 mM PCR primer L1', 0.8  $\mu$ l*  
760 *Phusion polymerase), PCR program (Initial denaturation: 98°C, 30s, (Denaturation;*  
761 *98°C, 10s, Annealing: 60°C, 10s, Elongation: 72°C, 5s)x10 cycles). One tube was*  
762 *removed from the PCR reaction after cycles 7, 8, 9 and 10. Samples were run on a 8%*  
763 *TBE polyacrylamide gel (Invitrogen) in 1x TBE (Ambion) for 55 min at 180 V. Gels were*  
764 *stained as mentioned before, desired bands from each PCR reaction were excised*  
765 *and DNA was extracted as described before for the ssDNA samples. Size distribution*  
766 *of DNA fragments was determined by Bioanalyzer, concentration was determined by*  
767 *Qubit (#Q32852, Invitrogen) and samples were sequenced on a HiSeq (Illumina).*

768 Sequenced reads were processed as described previously (Galmozzi, Merker,  
769 Friedrich, Doring, & Kramer, 2019) using standard analysis tools (Bowtie2, Tophat2)  
770 and python scripts adapted to *S. cerevisiae*. For each read, the P-site position was  
771 determined using a 5' offset of 15 nucleotides. Only reads with a length of 25-35  
772 nucleotides were used. Reads with P sites falling within an annotated ORF were  
773 counted, differential expression analysis was performed with DESeq2 (Love, Huber, &  
774 Anders, 2014) and false discovery rate was controlled using the Benjamini-Hochberg  
775 procedure (Benjamini & Hochberg, 1995) with independent hypothesis weighting  
776 (Ignatiadis, Klaus, Zaugg, & Huber, 2016).

777

## 778 **SUPPLEMENTAL TABLES**

779 **Suppl. Table S1.** UPOM screening results

780 **Suppl. Table S2.** Ribosome profiling

781

782 **SUPPLEMENTAL FIGURES**

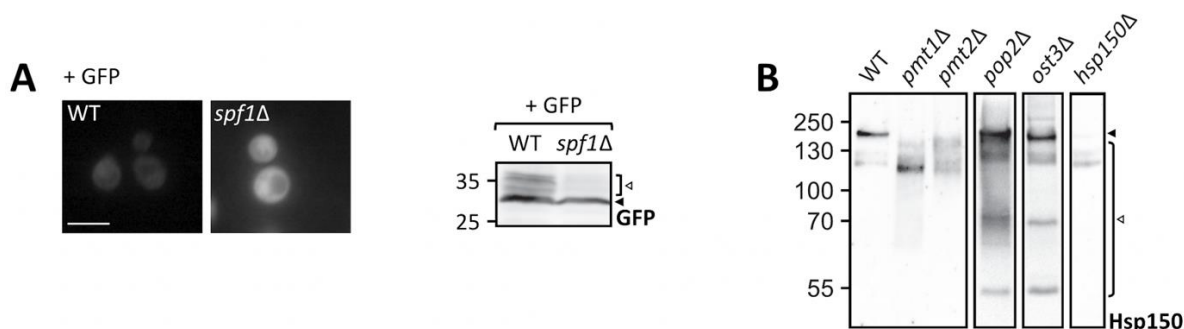

783  
784 **Suppl. Fig. 1. Evaluation of UPOM screen hit *spf1Δ* using ER-GFP and of *pop2Δ***  
785 **and *ost3Δ* using Hsp150. A)** Analysis of ER-GFP subcellular localization in wild type  
786 (BY4741) cells and in a screening independent *spf1Δ* strain and Western blot analysis  
787 of ER-GFP O-mannosylation in total cell extracts from the same strains. Cells were  
788 transformed with ER-GFP and grown in SD supplemented with uracil for selection  
789 before being imaged under standard conditions (scale bar 5  $\mu$ m) or lysed for Western  
790 blot analysis. Equivalent to 0.2 OD<sub>600</sub> were resolved on a 12% PAA gel and detection  
791 was performed with an anti-GFP antibody. **B)** Western blot analysis of Hsp150 in  
792 *pop2Δ* and *ost3Δ* cells used for clustering of UPOM screen hits. Viable single deletion  
793 mutants were retrieved from the Euroscarf collection and subjected to heat shock to  
794 induce Hsp150 secretion. Proteins of the medium were resolved on 8% PAA gels and  
795 detection was performed with an anti-Hsp150 antibody. Media from wild type and  
796 *hsp150Δ* cells were included as positive controls. Hsp150 fully glycosylated and  
797 hypoglycosylated fractions are indicated with black and white arrows respectively.  
798 Results from 100 deletion mutants identified as screening hits are summarized in  
799 Suppl. Table S1.

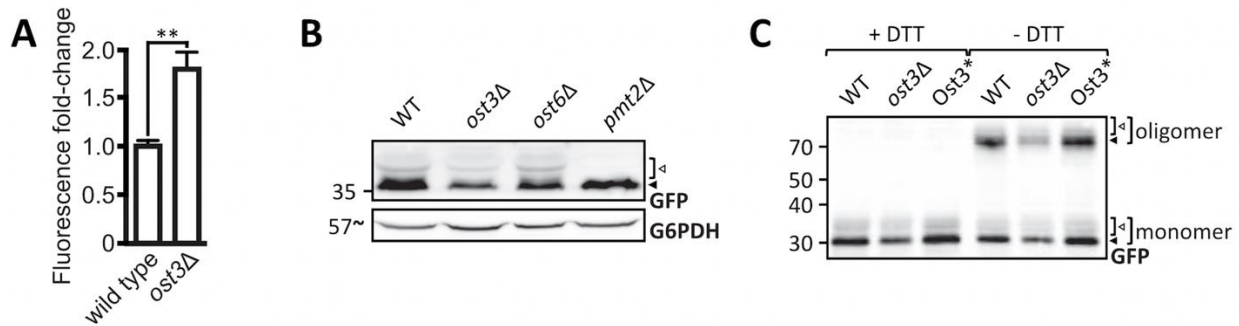

800

801 **Suppl. Fig. 2. Evaluation of UPOM screen hit *ost3Δ* using ER-GFP. A)** Flow  
802 cytometry analysis of EZY83 (wild type) and EZY82 (*ost3Δ*) cells grown to mid-log  
803 phase. Fluorescent signal resulting from analysis of 20000 cells was normalized to wild  
804 type and results are plotted as fold-change. Error bars represent the range of values  
805 from three independent experiments  $\pm$  SD. For statistical significance Tukey's HSD  
806 test was performed. Western blot analysis of **B)** ER-GFP O-mannosylation in total cell  
807 extracts from EZY70 (wild type), EZY77 (*ost3Δ*), EZY78 (*ost6Δ*) and *pmt2Δ* ER-GFP  
808 (*pmt2Δ*) strains and **C)** ER-GFP oligomerization in total cell extracts from EZY83 (wild  
809 type), EZY82 (*ost3Δ*) and EZY84 (*Ost3\**) strains. 20  $\mu$ g of protein were resolved on a  
810 12% PAA gel and detection was performed with an anti-GFP antibody. G6PDH was  
811 used as loading control. In **(C)** protein was denatured in sample buffer containing or  
812 lacking DTT. Monomeric and oligomeric ER-GFP as well as the main ER-GFP signal  
813 and higher O-mannosylated GFP-fractions are depicted by black and white arrows  
814 respectively.

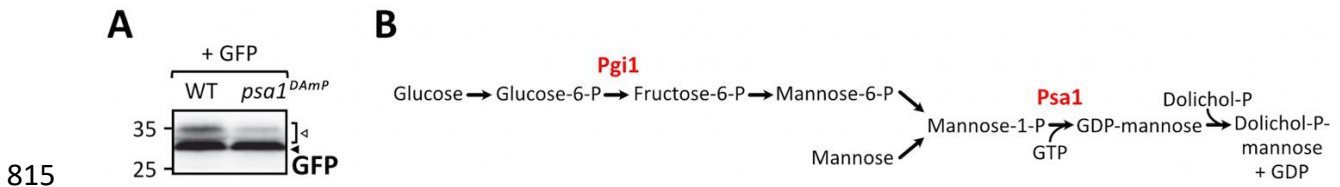

815

816 **Suppl. Fig. 3. Evaluation of UPOM screen hit *psa1* $\Delta$  using ER-GFP. A)** Western

817 blot analysis of ER-GFP O-mannosylation in total cell extracts from wild type (BY4741)

818 cells and the screening derived *Psa1*<sup>DAmp</sup> mutant. Equivalentents to 0.2 OD<sub>600</sub> were

819 resolved on a 12% PAA gel and detection was performed with an anti-GFP antibody.

820 Arrows on the right indicate the main GFP signal (black arrow) and signals emanating

821 from higher O-mannosylated GFP fractions (white arrow). **B)** Scheme of cytosolic

822 pathways producing GDP-mannose with the UPOM screen hits Pgi1 and Psa1

823 highlighted in red.

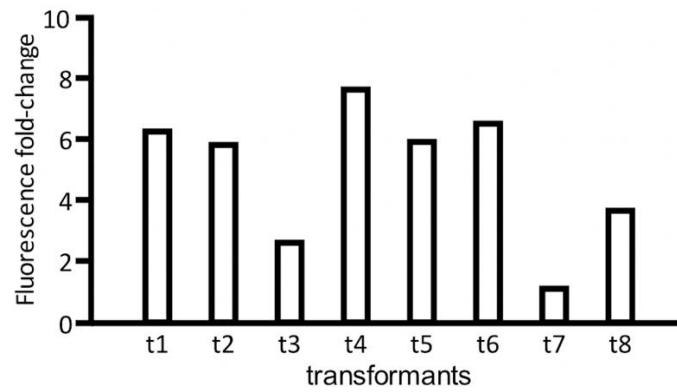

824

825 **Suppl. Fig. 4. Analysis of screen-independent *bfr1*Δ knockout transformants.**

826 *BFR1* was knocked out in JEY06 (wild type ER-GFP) by homologous recombination.

827 The knockout cassette containing up- and downstream *BFR1* homologous regions and

828 *KanMX6* was generated via PCR from pUG6. After selection, *KanMX6* insertion was

829 verified by PCR and eight independent transformants were grown in YPD and analyzed

830 via flow cytometry. Fluorescent signal resulting from analysis of 20000 cells was

831 normalized to wild type and results are plotted as fold-change.

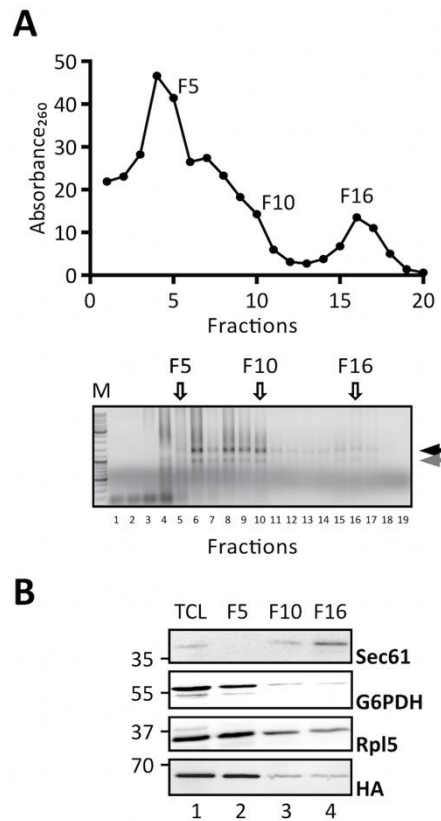

832

833 **Suppl. Fig. 5. Control experiment to the *PMT1* and *PMT2* transcript localization**

834 **experiment depicted in Fig. 6.** The experiment was performed as described in Fig.

835 6, however, in presence of EDTA. EDTA was added to total cell lysates to a final

836 concentration of 30 mM. **A)** EDTA treatment causes the rRNA associated

837 Absorbance<sub>260</sub> to shift from ribosome associated fractions F10 (free ribosomes) and

838 F16 (ribosomes in polysomes) to the cytoplasmic fraction F5 (upper panel) as well as

839 disassembly of ribosomal subunits depicted by the black and grey arrow (lower panel).

840 **B)** In line with Bfr1 being primarily associated with ribosomes, EDTA treatment leads

841 to redistribution of Bfr1 (HA-signal) from F10 and F16 to F5.

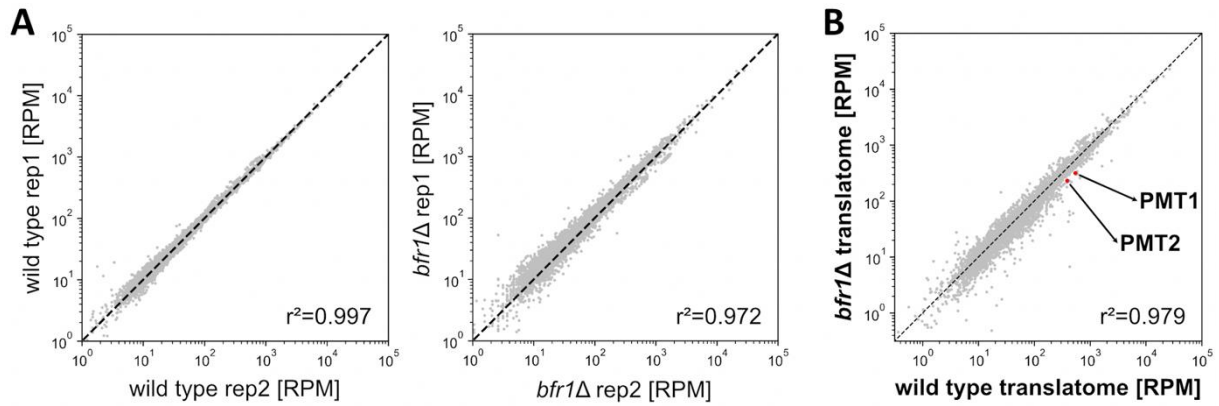

842

843 **Suppl. Fig. 6. Active translation of Pmt1 and Pmt2 is significantly reduced in the**

844 **absence of Bfr1. A)** Correlation scatter plots of replicates (rep) from wild type and

845 *bfr1*Δ cells. **B)** Scatter plot comparing normalized ribosome densities between wild

846 type and *bfr1*Δ cells across the *S. cerevisiae* transcriptome. Pmt1 and Pmt2 are 1.7-

847 fold downregulated in *bfr1*Δ versus wild type cells (indicated with red dots). Data were

848 normalized to RPMs (reads per million mapped reads).



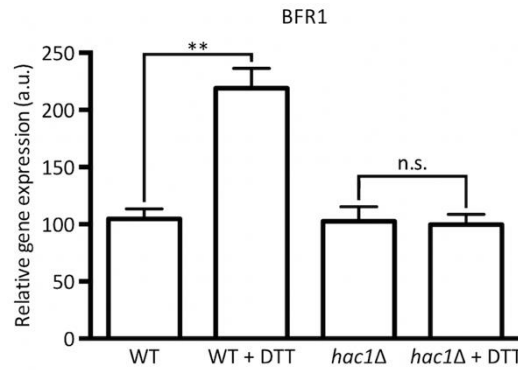

849

850 **Suppl. Fig. 7. *BFR1* is induced by the UPR.** RT-PCR analysis of *BFR1* mRNA levels  
851 in wild type and *hac1Δ* cells in response to DTT. Wild type (BY4741) and *hac1Δ*  
852 (Euroscarf) cells were treated with 2.2 mM DTT for 60 min, total RNA was extracted,  
853 and cDNA was prepared and used as a template for RT-PCR. Results show mRNA  
854 abundance with respect to *ACT1* mRNA from three independent experiments  $\pm$  SD.  
855 For statistical significance a two-tailed t-test was applied (n=3). N.s.=not significant

856 **Author Contributions:** Joan Castells-Ballester, Guenther Kramer, Maya Schuldiner  
857 and Sabine Strahl conceived of and designed the experiments. Joan Castells-  
858 Ballester, Lihi Gal, Ilgin Kotan, Daniela Bausewein and Ewa Zatorska performed the  
859 experiments. Joan Castells-Ballester, Natalie Rinis and Ilia Kats analyzed and  
860 evaluated data. Natalie Rinis, Joan Castells-Ballester and Sabine Strahl wrote the  
861 paper. Maya Schuldiner and Bernd Bukau edited the paper.

862  
863 **Funding:** This work was supported by the Deutsche Forschungsgemeinschaft,  
864 Sonderforschungsbereich 1036, project 11 (to S. Strahl) and project 08 (to B. Bukau).  
865 Work in the M. Schuldiner lab is supported by an Israeli science foundation grant  
866 (760/17) and a Minerva foundation grant. MS is an incumbent of the Dr. Gilbert Omenn  
867 and Martha Darling Professorial Chair in Molecular Genetics.

868  
869 **Acknowledgments:** We are grateful to Davis Ng for providing plasmids pWX204 and  
870 pWX206. We thank Anke Metschies and Silvia Chuartzman for excellent technical  
871 assistance, Sven Klassa for his help on the analysis of *psa1<sup>DAmp</sup>* and *pgi1<sup>DAmp</sup>* mutants  
872 and Jakob Engel for generating yeast strains JEY05 and JEY06.

873  
874 **Conflicts of Interest:** The authors declare no conflict of interest.

875 **FIGURES**

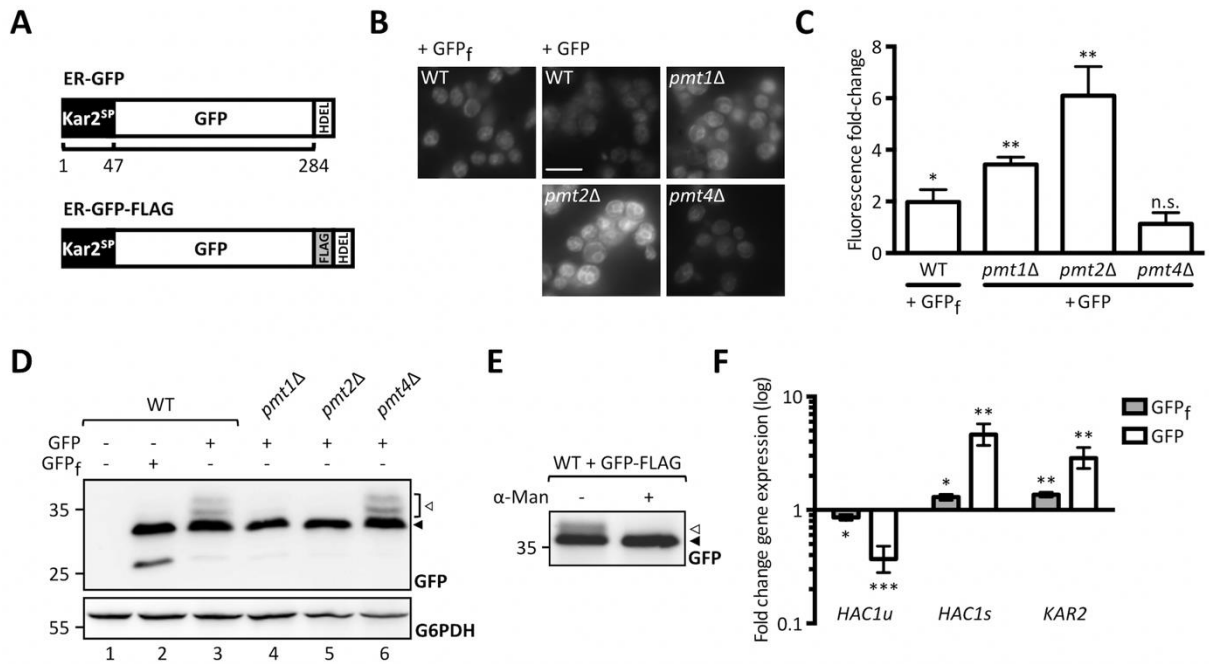

876

877 **Fig. 1. Analysis of ER-GFP as a UPOM-reporter. A)** Schematic representation of  
878 ER-GFP N-terminally fused to the ER targeting signal peptide from Kar2 and C-  
879 terminally fused to the HDEL ER retention sequence (upper panel) and scheme of  
880 FLAG-tagged ER-GFP used for immunoprecipitation in C (lower panel). Fluorescence  
881 analysis of wild type and *pmtΔ* strains with genomically integrated ER-GFP by  
882 microscopy (**B**) and flow cytometry (**C**). JEY06 (wild type ER-GFP), JCY010 (*pmt1Δ*  
883 ER-GFP), JCY011 (*pmt2Δ* ER-GFP), JCY012 (*pmt4Δ* ER-GFP) and JEY05 (wild type  
884 expressing ER-GFP<sub>f</sub> as negative control) cells were grown in YPD before being imaged  
885 under standard conditions (scale bar 10 μm) (**B**) or analyzed by flow cytometry (**C**). In  
886 (**C**) fluorescent signals resulting from analysis of 20000 cells were normalized to wild  
887 type and results are plotted as fold-change. Error bars represent the range of values  
888 from three independent experiments. For statistical significance one-sample t-test was  
889 performed on log<sub>2</sub>(fold change). **D)** Western blot analysis of ER-GFP O-mannosylation  
890 in total cell extracts from strains shown in (**B**) and (**C**). 20 μg of protein were resolved  
891 on a 12% PAA gel and detection was performed with an anti-GFP antibody. Wild type  
892 cells expressing ER-GFP<sub>f</sub> served as negative control and G6PDH was used as loading  
893 control. Arrows on the right indicate the main GFP signal (black arrow) and signals  
894 emanating from higher O-mannosylated GFP fractions (white arrow). **E)** FLAG-tag  
895 immunoprecipitation of ER-GFP on total cell extracts from wild type cells expressing  
896 FLAG-tagged ER-GFP from the pN014 plasmid. Purified ER-GFP-FLAG-HDEL was  
897 subjected to α1-2,3,6 mannosidase treatment overnight at 37°C and resolved on a

898 12% PAA gel. Detection was performed with an anti-GFP antibody. The signals  
899 emanating from higher O-mannosylated GFP-fractions (white arrow) collapse upon  
900 treatment into the main GFP signal (black arrow). Results are representative of two  
901 independent experiments. **F)** RT-PCR analysis of *HAC1u*, *HAC1s* and *KAR2* mRNA  
902 levels in wild type cells expressing ER-GFP<sub>f</sub> and ER-GFP respectively. JEY05 (wild  
903 type ER-GFP<sub>f</sub>) and JEY06 (wild type ER-GFP) cells were grown in YPD, total RNA  
904 was extracted, and cDNA was prepared and used as a template for RT-PCR. Fold-  
905 change was calculated from three independent experiments with respect to *ACT1*  
906 mRNA and error bars represent the confidence interval. For statistical significance one-  
907 sample t-test was performed on  $\log_2^{-\Delta\Delta Ct}$ . N.s.=not significant

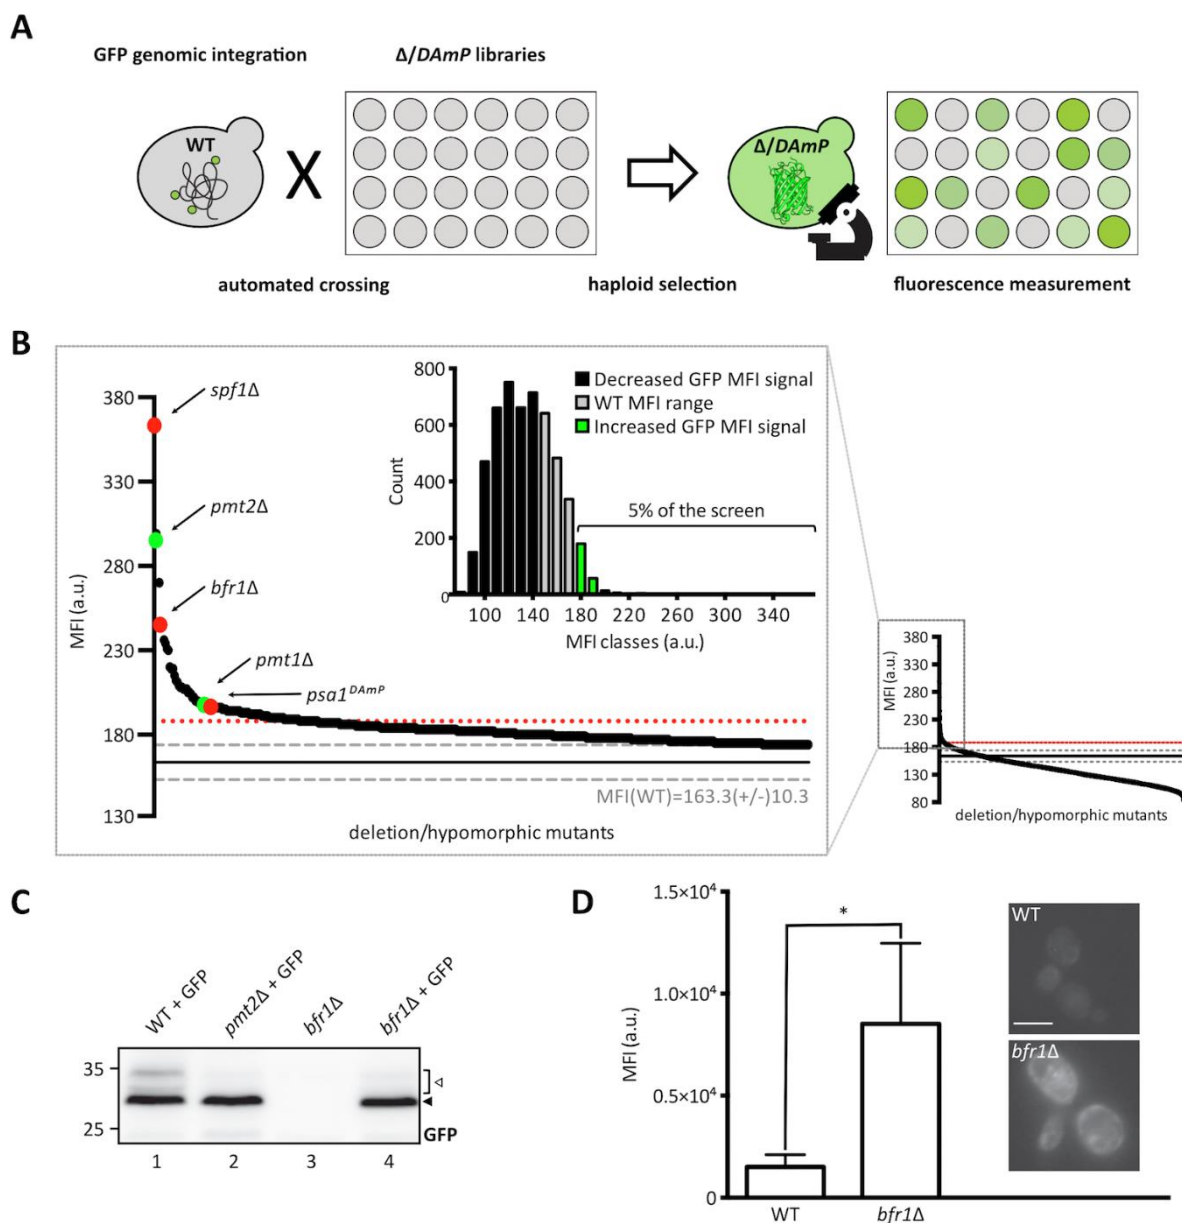

908

909 **Fig. 2. Identification of Bfr1 in a genome-wide UPOM screen. A)** Schematic  
 910 flowchart representing the major steps of the genome-wide high-throughput screen for  
 911 identification of UPOM factors using ER-GFP as a fluorescent reporter. In brief, the  
 912 ER-GFP expressing JEY06 strain was crossed with the yeast deletion library (Giaever  
 913 et al., 2002) and the DAmP library (Breslow et al., 2008) on 1536 colony format YPD  
 914 plates. Obtained diploids were selected for ER-GFP as well as deletion/DAmP  
 915 mutations using KanR and URA3 respectively. Sporulation was induced upon nitrogen  
 916 starvation for 7 days and haploid cells were selected on SD plates with aforementioned  
 917 selections as well as toxic amino acid derivatives to eliminate residual diploids.  
 918 Haploids were immobilized on Concanavalin A coated 384 well format microscopy  
 919 plates and analyzed using an automated microscopy setup (Breker et al., 2013). **B)**

920 Graphic representation of screening results. The small graph on the right represents  
921 the median fluorescence intensity (MFI) distribution of mutant strains (x-axis) analyzed  
922 within the UPOM screen. The magnified region on the left contains mutants that display  
923 fluorescence intensities that exceed the range of wild type MFI (163.6 +/- 10.3,  
924 indicated by grey dashed lines). The threshold for positive hit selection is marked by a  
925 red dotted line. Coloured dots depict expected hits (*PMT1* and *PMT2* in green) and hits  
926 that were further analyzed (*SPF1*, *BFR1* and *PSA1* in red). The bar graph on the upper  
927 left represents the median intensity frequency distribution of all mutant strains. Bars in  
928 grey depict frequencies of mutant strains with fluorescence within the wild type MFI  
929 range. Black and green bars represent frequencies of mutant strains with GFP signals  
930 below or above the wild type MFI range respectively. **C)** Western blot analysis of ER-  
931 GFP O-mannosylation in total cell extracts from wild type (BY4741) and *bfr1* $\Delta$  strains  
932 from the ER-GFP screen. Equivalent to 0.2 OD<sub>600</sub> were resolved on a 12% PAA gel  
933 and detection was performed with an anti-GFP antibody. A *pmt2* $\Delta$  strain expressing  
934 ER-GFP served as a positive control. Arrows on the right indicate the main GFP signal  
935 (black arrow) and signals emanating from higher O-mannosylated GFP fractions (white  
936 arrow). In *bfr1* $\Delta$  cells no higher O-mannosylated GFP fractions are detected. **D)** JEY06  
937 (wild type) and a *de novo* generated *bfr1* $\Delta$  strain in which ER-GFP was genomically  
938 integrated were grown in YPD media before being analyzed by flow cytometry or  
939 imaged under standard conditions (scale bar 5  $\mu$ m). Fluorescent signal resulting from  
940 analysis of 20000 cells via flow cytometry was normalized to wild type and error bars  
941 represent the range of values from three independent experiments. For statistical  
942 significance one-sample t-test was performed on log<sub>2</sub>(fold change).

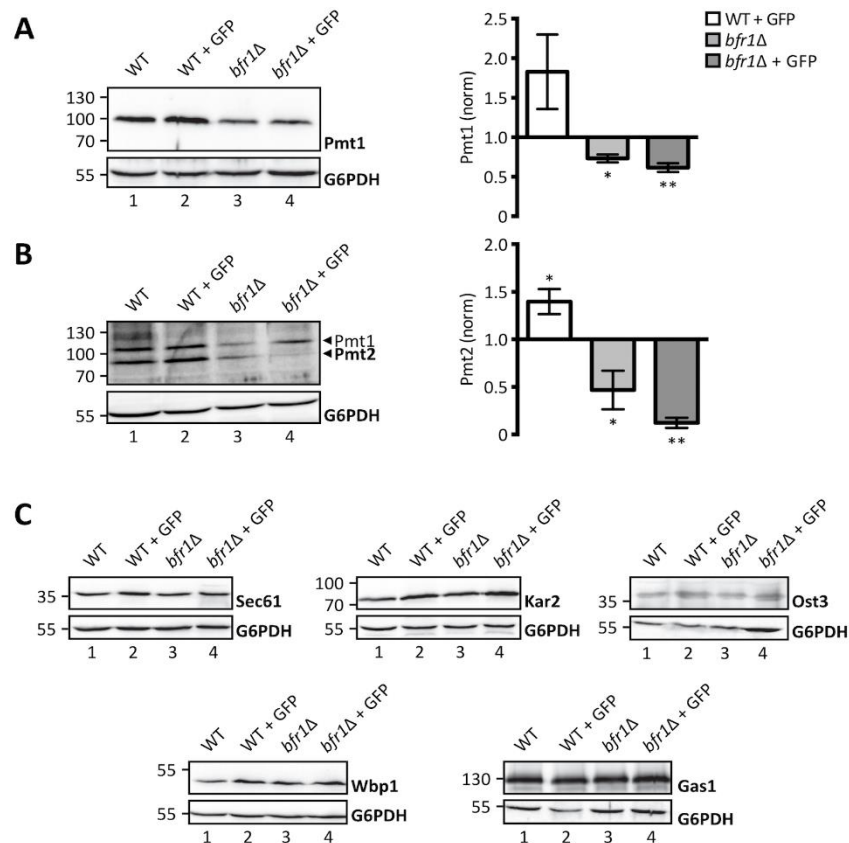

943

944 **Fig. 3. Pmt1 and Pmt2 protein levels are reduced in *BFR1* deficient cells.** Western

945 blot analysis of protein levels of Pmt1 (**A**), Pmt2 (**B**), and other representative proteins

946 known to be targeted by Bfr1 (Lapointe et al., 2015) (**C**) in total cell extracts from wild

947 type (BY4741), JEY06 (wild type ER-GFP), *bfr1Δ* and *bfr1Δ* ER-GFP strains. (**A**) and

948 (**B**) left panels: 20 μg of protein were resolved on a 12% PAA gel and detection was

949 performed with an anti-Pmt1 and anti-Pmt2 antibody respectively. Pmt2 detection was

950 initially performed with a polyclonal serum detecting Pmt1 at the same time (lower and

951 upper band indicated by black arrows respectively). In subsequent experiments

952 preabsorption of the polyclonal serum was performed on membranes from *PMT2*

953 deficient cells (single band detection for Pmt2 in e.g. Fig. 4). G6PDH was used as

954 loading control. (**A**) and (**B**) right panels: Western blot signals were quantified using

955 Image Studio Lite v 5.2 and PMT signals were first normalized to the respective

956 G6PDH signals and subsequently normalized to the Pmt/G6PDH ratio calculated for

957 wild type cells. Error bars represent the range of values from three independent

958 experiments. For statistical significance one-sample t-test was performed on log<sub>2</sub>(fold

959 change). (**C**) 20 μg of protein were resolved on a 12% PAA gel and detection was

960 performed with the indicated antibodies. G6PDH was used as loading control and

961 results are representative of three independent experiments.

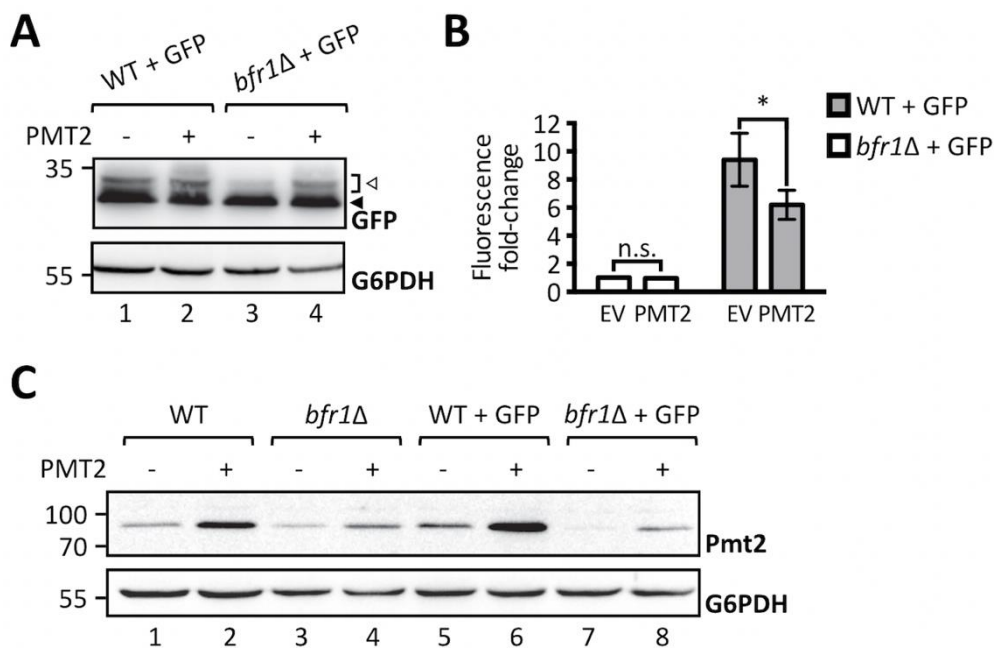

962  
 963 **Fig. 4. Pmt2 overexpression partially rescues loss of ER-GFP O-mannosylation**  
 964 **in *bfr1Δ* cells. A)** Western blot analysis of ER-GFP O-mannosylation in total cell  
 965 extracts from JEY06 (wild type ER-GFP) and *bfr1Δ* ER-GFP strains transformed with  
 966 either pRS41N (empty vector) or pJC09 (*PMT2*). Strains were grown under standard  
 967 conditions in YPD supplemented with nourseothricin for selection. 20 μg of protein  
 968 were resolved on a 12% PAA gel and detection was performed with an anti-GFP  
 969 antibody. G6PDH was used as loading control. Arrows on the right indicate the main  
 970 GFP signal (black arrow) and signals emanating from higher O-mannosylated GFP  
 971 fractions (white arrow). Pmt2 overexpression partially restores ER-GFP O-  
 972 mannosylation in the *bfr1Δ* strain. **B)** Flow cytometry analysis of strains described in  
 973 **(A)**. Fluorescent signal for each strain resulted from analysis of 20000 cells and  
 974 statistical significance was assessed by a 2way ANOVA on three independent  
 975 experiments. Pmt2 overexpression partially restores ER-GFP fluorescence to the level  
 976 detected in the JEY06 strain. **C)** Western blot analysis of Pmt2 protein levels in total  
 977 cell extracts from wild type (BY4741), *bfr1Δ*, JEY06 (wild type ER-GFP) and *bfr1Δ* ER-  
 978 GFP strains transformed with either pRS41N (empty vector) or pJC09 (*PMT2*) and  
 979 grown as in **(A)**. 20 μg of protein were resolved on a 12% PAA gel and detection was  
 980 performed with an anti-Pmt2 antibody. G6PDH was used as loading control. N.s.=not  
 981 significant



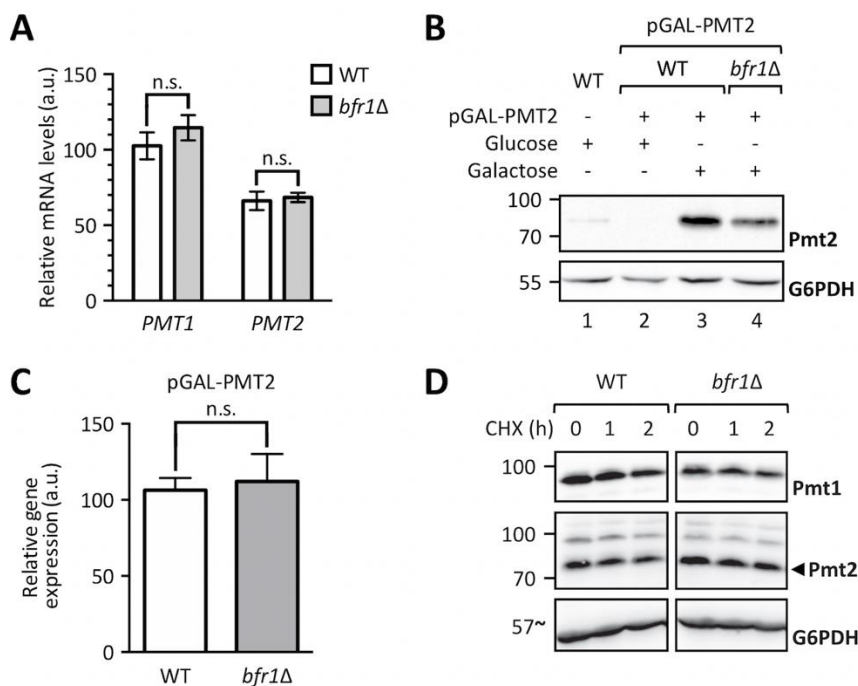

982

983 **Fig. 5. *BFR1* deletion does not affect *PMT1* and *PMT2* transcription. A)** RT-PCR

984 analysis of *PMT1* and *PMT2* mRNA levels in wild type (BY4741) and *bfr1Δ* strains.

985 Cells were grown in YPD medium, total RNA was extracted and cDNA was prepared

986 and used as a template for RT-PCR. Results show mRNA abundance with respect to

987 *TAF10* mRNA from three independent experiments  $\pm$  SD. For statistical significance a

988 multiple t-test was performed. **B)** Western blot analysis of Pmt2 protein levels

989 expressed under the control of a *GAL1* inducible promoter in total cell extracts from

990 strains described in **(A)** upon addition of indicated sugars. **C)** RT-PCR analysis of

991 *PMT2* mRNA levels in strains described in **(A)** in which Pmt2 is expressed under the

992 control of a *GAL1* inducible promoter upon growth in galactose containing media.

993 Results show mRNA abundance with respect to *ACT1* mRNA from three independent

994 experiments  $\pm$  SD. For statistical significance an unpaired t-test was performed.

995 N.s.=not significant

996

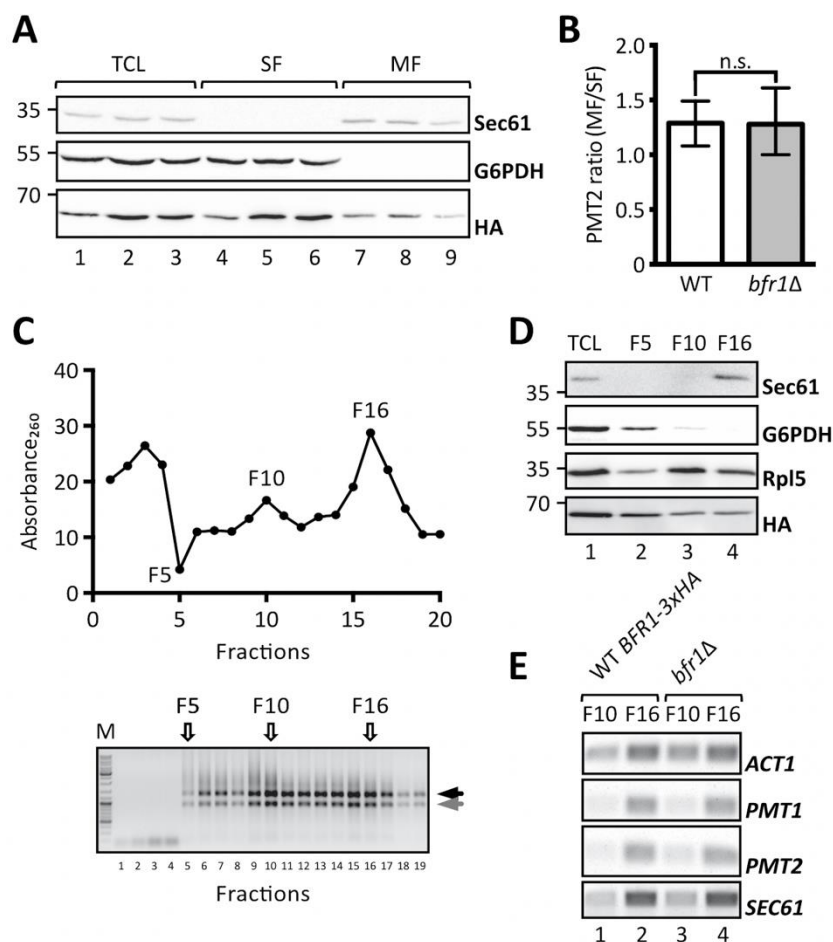

997  
 998 **Fig. 6. *BFR1* deletion does not affect *PMT1* and *PMT2* transcript localization. (A)**  
 999 **and (B):** JCY017 (wild type *BFR1*-3xHA) cells were grown in YPD medium, lysed and  
 1000 total cell extracts were subjected to one step ultracentrifugation. **A)** Western blot  
 1001 analysis of total cell lysates (TCL), soluble and membrane fractions (SF and MF  
 1002 respectively) upon one step ultracentrifugation. Equivalents to 0.25 OD<sub>600</sub> were  
 1003 resolved on a 12% PAA gel and detection was performed with the indicated antibodies.  
 1004 Sec61 served as a membrane marker and G6PDH as a cytosolic marker. *Bfr1*-3xHA  
 1005 was detected using the HA-tag. **B)** RT-PCR analysis of *PMT2* mRNA from soluble and  
 1006 membrane fractions upon one step ultracentrifugation. Total RNA was extracted from  
 1007 respective fractions and cDNA was prepared. *PMT2* mRNA from each fraction was  
 1008 normalized to *ACT1* mRNA. Results show the average membrane to soluble *PMT2*  
 1009 mRNA ratio from three independent experiments and error bars represent the  
 1010 confidence interval. For statistical significance one-sample t-test was performed on  
 1011 log<sub>2</sub>- $\Delta\Delta C_t$ . **(C), (D)** and **(E):** JCY017 (wild type *BFR1*-3xHA) and *bfr1Δ* cells were grown  
 1012 in YPD medium, lysed and total cell extracts were subjected to sucrose step gradient  
 1013 centrifugation. **C)** Absorbance<sub>260</sub> profile of fractions collected upon sucrose step  
 1014 gradient centrifugation (upper panel) and agarose gel electrophoresis of equivalent

1015 amounts of each fraction (lower panel). F5, F10 and F16 indicate fractions selected for  
1016 further analysis. Black and grey arrows next to the agarose gel depict ribosomal  
1017 subunits 60S and 40S. **D)** Western blot analysis of total cell lysates (TCL) and selected  
1018 sucrose gradient fractions from JCY017 (wild type BFR1-3xHA) cells. 0.25 OD<sub>600</sub> units  
1019 of total cell extract and equivalents of selected fractions were resolved on a 12% PAA  
1020 gel and detection was performed with the indicated antibodies. Sec61 and G6PDH  
1021 were detected exclusively in fractions F16 and F5 respectively confirming successful  
1022 fractionation. The ribosomal protein Rpl5 was mainly detected in fractions F10 and F16  
1023 that represent cytoplasmic and membrane bound polysomes respectively. The weaker  
1024 Rpl5 signal detected in fraction F5 probably emanates from free cytosolic ribosomes.  
1025 **E)** Semi-quantitative PCR analysis of *PMT1* and *PMT2* mRNA from sucrose gradient  
1026 fractions F10 and F16 from JCY017 (wild type BFR1-3xHA) and *bfr1*Δ cells. Total RNA  
1027 was extracted from respective fractions, cDNA was prepared and a 1:20 dilution was  
1028 used as template in a standard DreamTaq PCR reaction. ACT1 that served as a  
1029 loading control also shows strong engagement in the ER membrane containing fraction  
1030 F16 in line with reports that the ER is a general translation hub even for cytosolic  
1031 proteins (Pyhtila et al., 2008). Results are representative of two independent  
1032 fractionations. N.s.=not significant

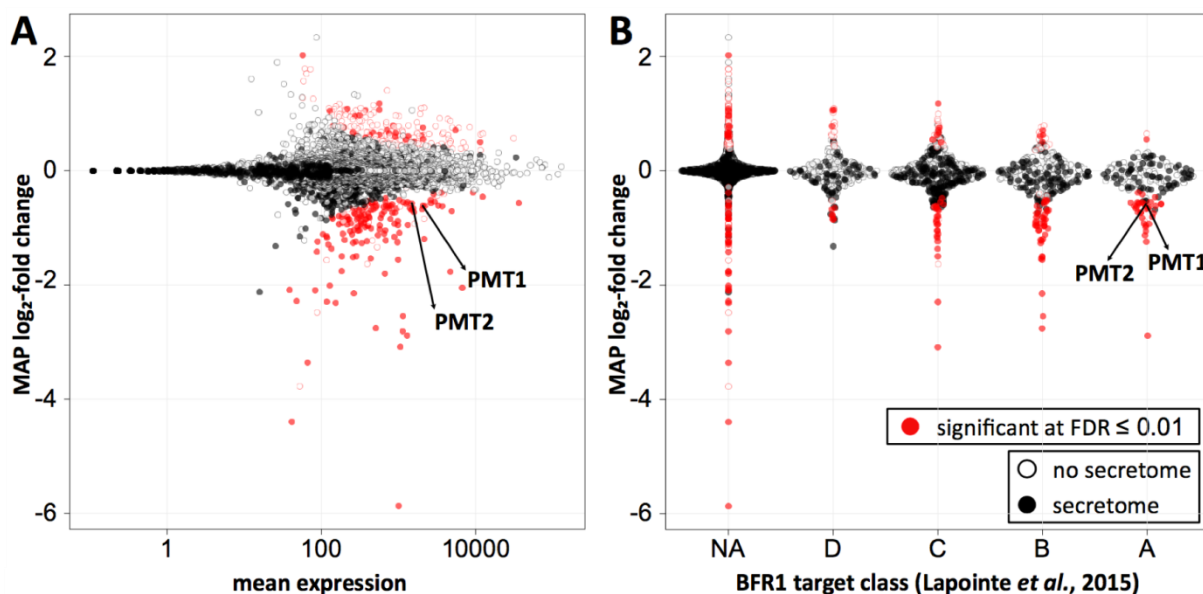

1033  
1034 **Fig. 7. Bfr1 significantly enhances active translation of Pmt1 and Pmt2 and of a**  
1035 **subgroup of secretory pathway proteins whose transcripts are strong Bfr1**  
1036 **interactors. A)** MA plot showing active translation in *bfr1*Δ compared to wild type.  
1037 Proteins for which translation is significantly affected in *bfr1*Δ versus wild type cells are  
1038 depicted in red with filled red dots representing proteins assigned to the secretory  
1039 pathway according to (Ast et al., 2013). Pmt1 and Pmt2 translation is significantly  
1040 reduced in *bfr1*Δ cells. **B)** Ribosome profiling data were combined with data from an *in*  
1041 *vivo* RNA tagging approach performed for Bfr1 (Lapointe et al., 2015). Classes A-D  
1042 outlined in (Lapointe et al., 2015) contain candidates that are bound by Bfr1 to different  
1043 extents: The strongest binders are in class A. In classes A and B most significantly  
1044 affected proteins are down- rather than upregulated and are assigned to the secretory  
1045 pathway (Ast et al., 2013). Pmt1 and Pmt2 are found among significantly  
1046 downregulated proteins in class A. In **(A)** and **(B)** log<sub>2</sub>-fold changes were shrunken  
1047 towards 0 using a Cauchy prior (Zhu, Ibrahim, & Love, 2019), the mode of the posterior  
1048 distribution is shown. The amount of shrinkage is proportional to the gene-specific  
1049 variance. FDR=false discovery rate, NA=not assigned

1050 **REFERENCES**

- 1051 Albihlal, W. S., & Gerber, A. P. (2018). Unconventional RNA-binding proteins: an  
1052 uncharted zone in RNA biology. *FEBS Lett*, *592*(17), 2917-2931.  
1053 doi:10.1002/1873-3468.13161
- 1054 Ambroziak, J., & Henry, S. A. (1994). INO2 and INO4 gene products, positive  
1055 regulators of phospholipid biosynthesis in *Saccharomyces cerevisiae*, form a  
1056 complex that binds to the INO1 promoter. *J Biol Chem*, *269*(21), 15344-15349.
- 1057 Aronov, S., Dover-Biterman, S., Suss-Toby, E., Shmoish, M., Duek, L., & Choder, M.  
1058 (2015). Pheromone-encoding mRNA is transported to the yeast mating  
1059 projection by specific RNP granules. *J Cell Biol*, *209*(6), 829-842.  
1060 doi:10.1083/jcb.201408045
- 1061 Arroyo, J., Hutzler, J., Bermejo, C., Ragni, E., Garcia-Cantalejo, J., Botias, P., . . .  
1062 Strahl, S. (2011). Functional and genomic analyses of blocked protein O-  
1063 mannosylation in baker's yeast. *Mol Microbiol*, *79*(6), 1529-1546.  
1064 doi:10.1111/j.1365-2958.2011.07537.x
- 1065 Ast, T., Cohen, G., & Schuldiner, M. (2013). A network of cytosolic factors targets SRP-  
1066 independent proteins to the endoplasmic reticulum. *Cell*, *152*(5), 1134-1145.  
1067 doi:10.1016/j.cell.2013.02.003
- 1068 Aviram, N., & Schuldiner, M. (2017). Targeting and translocation of proteins to the  
1069 endoplasmic reticulum at a glance. *J Cell Sci*, *130*(24), 4079-4085.  
1070 doi:10.1242/jcs.204396
- 1071 Bays, N. W., Gardner, R. G., Seelig, L. P., Joazeiro, C. A., & Hampton, R. Y. (2001).  
1072 Hrd1p/Der3p is a membrane-anchored ubiquitin ligase required for ER-  
1073 associated degradation. *Nat Cell Biol*, *3*(1), 24-29. doi:10.1038/35050524
- 1074 Benjamini, Y., & Hochberg, Y. (1995). Controlling the False Discovery Rate: A Practical  
1075 and Powerful Approach to Multiple Testing. *Journal of the Royal Statistical*  
1076 *Society. Series B (Methodological)*, *57*(1), 289-300.
- 1077 Brachmann, C. B., Davies, A., Cost, G. J., Caputo, E., Li, J., Hieter, P., & Boeke, J. D.  
1078 (1998). Designer deletion strains derived from *Saccharomyces cerevisiae*  
1079 S288C: a useful set of strains and plasmids for PCR-mediated gene disruption  
1080 and other applications. *Yeast*, *14*(2), 115-132. doi:10.1002/(sici)1097-  
1081 0061(19980130)14:2<115::Aid-yea204>3.0.Co;2-2
- 1082 Brancaccio, A. (2019). A molecular overview of the primary dystroglycanopathies. *J*  
1083 *Cell Mol Med*, *23*(5), 3058-3062. doi:10.1111/jcmm.14218
- 1084 Brar, G. A., & Weissman, J. S. (2015). Ribosome profiling reveals the what, when,  
1085 where and how of protein synthesis. *Nat Rev Mol Cell Biol*, *16*(11), 651-664.  
1086 doi:10.1038/nrm4069
- 1087 Breker, M., Gymrek, M., & Schuldiner, M. (2013). A novel single-cell screening platform  
1088 reveals proteome plasticity during yeast stress responses. *J Cell Biol*, *200*(6),  
1089 839-850. doi:10.1083/jcb.201301120
- 1090 Breslow, D. K., Cameron, D. M., Collins, S. R., Schuldiner, M., Stewart-Ornstein, J.,  
1091 Newman, H. W., . . . Weissman, J. S. (2008). A comprehensive strategy  
1092 enabling high-resolution functional analysis of the yeast genome. *Nat Methods*,  
1093 *5*(8), 711-718. doi:10.1038/nmeth.1234
- 1094 Burg, M. B., & Ferraris, J. D. (2008). Intracellular organic osmolytes: function and  
1095 regulation. *J Biol Chem*, *283*(12), 7309-7313. doi:10.1074/jbc.R700042200
- 1096 Carla Fama, M., Raden, D., Zacchi, N., Lemos, D. R., Robinson, A. S., & Silberstein,  
1097 S. (2007). The *Saccharomyces cerevisiae* YFR041C/ERJ5 gene encoding a  
1098 type I membrane protein with a J domain is required to preserve the folding

- 1099 capacity of the endoplasmic reticulum. *Biochim Biophys Acta*, 1773(2), 232-  
1100 242. doi:10.1016/j.bbamcr.2006.10.011
- 1101 Carvalho, S., Reis, C. A., & Pinho, S. S. (2016). Cadherins Glycans in Cancer: Sweet  
1102 Players in a Bitter Process. *Trends Cancer*, 2(9), 519-531.  
1103 doi:10.1016/j.trecan.2016.08.003
- 1104 Castells-Ballester, J., Zatorska, E., Meurer, M., Neubert, P., Metschies, A., Knop, M.,  
1105 & Strahl, S. (2018). Monitoring Protein Dynamics in Protein O-  
1106 Mannosyltransferase Mutants In Vivo by Tandem Fluorescent Protein Timers.  
1107 *Molecules*, 23(10). doi:10.3390/molecules23102622
- 1108 Christianson, T. W., Sikorski, R. S., Dante, M., Shero, J. H., & Hieter, P. (1992).  
1109 Multifunctional yeast high-copy-number shuttle vectors. *Gene*, 110(1), 119-122.  
1110 doi:0378-1119(92)90454-W [pii]
- 1111 Cohen, N., Breker, M., Bakunts, A., Pesek, K., Chas, A., Argemi, J., . . . Schuldiner, M.  
1112 (2017). Iron affects Ire1 clustering propensity and the amplitude of endoplasmic  
1113 reticulum stress signaling. *J Cell Sci*, 130(19), 3222-3233.  
1114 doi:10.1242/jcs.201715
- 1115 Cohen, Y., & Schuldiner, M. (2011). Advanced methods for high-throughput  
1116 microscopy screening of genetically modified yeast libraries. *Methods Mol Biol*,  
1117 781, 127-159. doi:10.1007/978-1-61779-276-2\_8
- 1118 Copic, A., Dorrington, M., Pagant, S., Barry, J., Lee, M. C., Singh, I., . . . Miller, E. A.  
1119 (2009). Genomewide analysis reveals novel pathways affecting endoplasmic  
1120 reticulum homeostasis, protein modification and quality control. *Genetics*,  
1121 182(3), 757-769. doi:10.1534/genetics.109.101105
- 1122 Coughlan, C. M., Walker, J. L., Cochran, J. C., Wittrup, K. D., & Brodsky, J. L. (2004).  
1123 Degradation of mutated bovine pancreatic trypsin inhibitor in the yeast vacuole  
1124 suggests post-endoplasmic reticulum protein quality control. *J Biol Chem*,  
1125 279(15), 15289-15297. doi:10.1074/jbc.M309673200
- 1126 Deshaies, R. J., & Schekman, R. (1987). A yeast mutant defective at an early stage in  
1127 import of secretory protein precursors into the endoplasmic reticulum. *J Cell*  
1128 *Biol*, 105(2), 633-645. doi:10.1083/jcb.105.2.633
- 1129 Doring, K., Ahmed, N., Riemer, T., Suresh, H. G., Vainshtein, Y., Habich, M., . . .  
1130 Bukau, B. (2017). Profiling Ssb-Nascent Chain Interactions Reveals Principles  
1131 of Hsp70-Assisted Folding. *Cell*, 170(2), 298-311.e220.  
1132 doi:10.1016/j.cell.2017.06.038
- 1133 Fisher, A. C., & DeLisa, M. P. (2008). Laboratory evolution of fast-folding green  
1134 fluorescent protein using secretory pathway quality control. *PLoS One*, 3(6),  
1135 e2351. doi:10.1371/journal.pone.0002351
- 1136 Galmozzi, C. V., Merker, D., Friedrich, U. A., Doring, K., & Kramer, G. (2019). Selective  
1137 ribosome profiling to study interactions of translating ribosomes in yeast. *Nat*  
1138 *Protoc*, 14(8), 2279-2317. doi:10.1038/s41596-019-0185-z
- 1139 Gentzsch, M., Immervoll, T., & Tanner, W. (1995). Protein O-glycosylation in  
1140 *Saccharomyces cerevisiae*: the protein O-mannosyltransferases Pmt1p and  
1141 Pmt2p function as heterodimer. *FEBS Lett*, 377(2), 128-130. doi:10.1016/0014-  
1142 5793(95)01324-5
- 1143 Giaever, G., Chu, A. M., Ni, L., Connelly, C., Riles, L., Veronneau, S., . . . Johnston,  
1144 M. (2002). Functional profiling of the *Saccharomyces cerevisiae* genome.  
1145 *Nature*, 418(6896), 387-391. doi:10.1038/nature00935
- 1146 Gilmore, R., Blobel, G., & Walter, P. (1982). Protein translocation across the  
1147 endoplasmic reticulum. I. Detection in the microsomal membrane of a receptor  
1148 for the signal recognition particle. *J Cell Biol*, 95(2 Pt 1), 463-469.  
1149 doi:10.1083/jcb.95.2.463

- 1150 Girrbaach, V., & Strahl, S. (2003). Members of the evolutionarily conserved PMT family  
1151 of protein O-mannosyltransferases form distinct protein complexes among  
1152 themselves. *J Biol Chem*, 278(14), 12554-12562. doi:10.1074/jbc.M212582200
- 1153 Goder, V., & Melero, A. (2011). Protein O-mannosyltransferases participate in ER  
1154 protein quality control. *J Cell Sci*, 124(Pt 1), 144-153. doi:10.1242/jcs.072181
- 1155 Guerra-Moreno, A., Ang, J., Welsch, H., Jochem, M., & Hanna, J. (2019). Regulation  
1156 of the unfolded protein response in yeast by oxidative stress. *FEBS Lett*,  
1157 593(10), 1080-1088. doi:10.1002/1873-3468.13389
- 1158 Guldener, U., Heck, S., Fielder, T., Beinbauer, J., & Hegemann, J. H. (1996). A new  
1159 efficient gene disruption cassette for repeated use in budding yeast. *Nucleic  
1160 Acids Res*, 24(13), 2519-2524. doi:10.1093/nar/24.13.2519
- 1161 Hashimoto, H., Sakakibara, A., Yamasaki, M., & Yoda, K. (1997). *Saccharomyces  
1162 cerevisiae* VIG9 encodes GDP-mannose pyrophosphorylase, which is essential  
1163 for protein glycosylation. *J Biol Chem*, 272(26), 16308-16314.  
1164 doi:10.1074/jbc.272.26.16308
- 1165 Hetz, C. (2012). The unfolded protein response: controlling cell fate decisions under  
1166 ER stress and beyond. *Nat Rev Mol Cell Biol*, 13(2), 89-102.  
1167 doi:10.1038/nrm3270
- 1168 Hirayama, H., Fujita, M., Yoko-o, T., & Jigami, Y. (2008). O-mannosylation is required  
1169 for degradation of the endoplasmic reticulum-associated degradation substrate  
1170 Gas1\*<sub>p</sub> via the ubiquitin/proteasome pathway in *Saccharomyces cerevisiae*. *J  
1171 Biochem*, 143(4), 555-567. doi:10.1093/jb/mvm249
- 1172 Hogan, D. J., Riordan, D. P., Gerber, A. P., Herschlag, D., & Brown, P. O. (2008).  
1173 Diverse RNA-binding proteins interact with functionally related sets of RNAs,  
1174 suggesting an extensive regulatory system. *PLoS Biol*, 6(10), e255.  
1175 doi:10.1371/journal.pbio.0060255
- 1176 Hutzler, F., Gerstl, R., Lommel, M., & Strahl, S. (2008). Protein N-glycosylation  
1177 determines functionality of the *Saccharomyces cerevisiae* cell wall integrity  
1178 sensor Mid2p. *Mol Microbiol*, 68(6), 1438-1449. doi:10.1111/j.1365-  
1179 2958.2008.06243.x
- 1180 Ignatiadis, N., Klaus, B., Zaugg, J. B., & Huber, W. (2016). Data-driven hypothesis  
1181 weighting increases detection power in genome-scale multiple testing. *Nat  
1182 Methods*, 13(7), 577-580. doi:10.1038/nmeth.3885
- 1183 Immervoll, T., Gentsch, M., & Tanner, W. (1995). PMT3 and PMT4, two new members  
1184 of the protein-O-mannosyltransferase gene family of *Saccharomyces  
1185 cerevisiae*. *Yeast*, 11(14), 1345-1351. doi:10.1002/yea.320111403
- 1186 Ingolia, N. T., Ghaemmaghami, S., Newman, J. R., & Weissman, J. S. (2009).  
1187 Genome-wide analysis in vivo of translation with nucleotide resolution using  
1188 ribosome profiling. *Science*, 324(5924), 218-223. doi:10.1126/science.1168978
- 1189 Jackson, C. L., & Kepes, F. (1994). BFR1, a multicopy suppressor of brefeldin A-  
1190 induced lethality, is implicated in secretion and nuclear segregation in  
1191 *Saccharomyces cerevisiae*. *Genetics*, 137(2), 423-437.
- 1192 Janik, A., Sosnowska, M., Kruszewska, J., Krotkiewski, H., Lehle, L., & Palamarczyk,  
1193 G. (2003). Overexpression of GDP-mannose pyrophosphorylase in  
1194 *Saccharomyces cerevisiae* corrects defects in dolichol-linked saccharide  
1195 formation and protein glycosylation. *Biochim Biophys Acta*, 1621(1), 22-30.  
1196 doi:10.1016/s0304-4165(03)00026-6
- 1197 Jurado, L. A., Coloma, A., & Cruces, J. (1999). Identification of a human homolog of  
1198 the *Drosophila* rotated abdomen gene (POMT1) encoding a putative protein O-  
1199 mannosyl-transferase, and assignment to human chromosome 9q34.1.  
1200 *Genomics*, 58(2), 171-180. doi:10.1006/geno.1999.5819

- 1201 Karaoglu, D., Kelleher, D. J., & Gilmore, R. (1995). Functional characterization of  
1202 Ost3p. Loss of the 34-kD subunit of the *Saccharomyces cerevisiae*  
1203 oligosaccharyltransferase results in biased underglycosylation of acceptor  
1204 substrates. *J Cell Biol*, 130(3), 567-577. doi:10.1083/jcb.130.3.567
- 1205 Kostova, Z., & Wolf, D. H. (2003). For whom the bell tolls: protein quality control of the  
1206 endoplasmic reticulum and the ubiquitin-proteasome connection. *Embo j*,  
1207 22(10), 2309-2317. doi:10.1093/emboj/cdg227
- 1208 Kraut-Cohen, J., Afanasieva, E., Haim-Vilmovsky, L., Slobodin, B., Yosef, I., Bibi, E.,  
1209 & Gerst, J. E. (2013). Translation- and SRP-independent mRNA targeting to the  
1210 endoplasmic reticulum in the yeast *Saccharomyces cerevisiae*. *Mol Biol Cell*,  
1211 24(19), 3069-3084. doi:10.1091/mbc.E13-01-0038
- 1212 Kumari, K., Das, B., Adhya, A. K., Rath, A. K., & Mishra, S. K. (2019). Genome-wide  
1213 expression analysis reveals six contravened targets of EZH2 associated with  
1214 breast cancer patient survival. *Sci Rep*, 9(1), 1974. doi:10.1038/s41598-019-  
1215 39122-4
- 1216 Lang, B. D., Li, A., Black-Brewster, H. D., & Fridovich-Keil, J. L. (2001). The brefeldin  
1217 A resistance protein Bfr1p is a component of polyribosome-associated mRNP  
1218 complexes in yeast. *Nucleic Acids Res*, 29(12), 2567-2574.  
1219 doi:10.1093/nar/29.12.2567
- 1220 Lapointe, C. P., Wilinski, D., Saunders, H. A., & Wickens, M. (2015). Protein-RNA  
1221 networks revealed through covalent RNA marks. *Nat Methods*, 12(12), 1163-  
1222 1170. doi:10.1038/nmeth.3651
- 1223 Loibl, M., & Strahl, S. (2013). Protein O-mannosylation: what we have learned from  
1224 baker's yeast. *Biochim Biophys Acta*, 1833(11), 2438-2446.  
1225 doi:10.1016/j.bbamcr.2013.02.008
- 1226 Loibl, M., Wunderle, L., Hutzler, J., Schulz, B. L., Aebi, M., & Strahl, S. (2014). Protein  
1227 O-mannosyltransferases associate with the translocon to modify translocating  
1228 polypeptide chains. *J Biol Chem*, 289(12), 8599-8611.  
1229 doi:10.1074/jbc.M113.543116
- 1230 Love, M. I., Huber, W., & Anders, S. (2014). Moderated estimation of fold change and  
1231 dispersion for RNA-seq data with DESeq2. *Genome Biol*, 15(12), 550.  
1232 doi:10.1186/s13059-014-0550-8
- 1233 Luo, Y., Na, Z., & Slavoff, S. A. (2018). P-Bodies: Composition, Properties, and  
1234 Functions. *Biochemistry*, 57(17), 2424-2431.  
1235 doi:10.1021/acs.biochem.7b01162
- 1236 Lussier, M., Gentzsch, M., Sdicu, A. M., Bussey, H., & Tanner, W. (1995). Protein O-  
1237 glycosylation in yeast. The PMT2 gene specifies a second protein O-  
1238 mannosyltransferase that functions in addition to the PMT1-encoded activity. *J*  
1239 *Biol Chem*, 270(6), 2770-2775. doi:10.1074/jbc.270.6.2770
- 1240 Manchalu, S., Mittal, N., Spang, A., & Jansen, R. P. (2019). Local translation of yeast  
1241 ERG4 mRNA at the endoplasmic reticulum requires the brefeldin A resistance  
1242 protein Bfr1. *Rna*. doi:10.1261/rna.072017.119
- 1243 Meyer, D. I., Krause, E., & Dobberstein, B. (1982). Secretory protein translocation  
1244 across membranes-the role of the 'docking protein'. *Nature*, 297(5868), 647-  
1245 650. doi:10.1038/297647a0
- 1246 Mitchell, S. F., Jain, S., She, M., & Parker, R. (2013). Global analysis of yeast mRNPs.  
1247 *Nat Struct Mol Biol*, 20(1), 127-133. doi:10.1038/nsmb.2468
- 1248 Mueller, S., Wahlander, A., Selevsek, N., Otto, C., Ngwa, E. M., Poljak, K., . . . Gauss,  
1249 R. (2015). Protein degradation corrects for imbalanced subunit stoichiometry in  
1250 OST complex assembly. *Mol Biol Cell*, 26(14), 2596-2608.  
1251 doi:10.1091/mbc.E15-03-0168



- 1252 Nakatsukasa, K., Okada, S., Umebayashi, K., Fukuda, R., Nishikawa, S., & Endo, T.  
1253 (2004). Roles of O-mannosylation of aberrant proteins in reduction of the load  
1254 for endoplasmic reticulum chaperones in yeast. *J Biol Chem*, 279(48), 49762-  
1255 49772. doi:10.1074/jbc.M403234200
- 1256 Neubert, P., Halim, A., Zauser, M., Essig, A., Joshi, H. J., Zatorska, E., . . . Strahl, S.  
1257 (2016). Mapping the O-Mannose Glycoproteome in *Saccharomyces cerevisiae*.  
1258 *Mol Cell Proteomics*, 15(4), 1323-1337. doi:10.1074/mcp.M115.057505
- 1259 Neubert, P., & Strahl, S. (2016). Protein O-mannosylation in the early secretory  
1260 pathway. *Curr Opin Cell Biol*, 41, 100-108. doi:10.1016/j.ceb.2016.04.010
- 1261 Nuoffer, C., Jenö, P., Conzelmann, A., & Riezman, H. (1991). Determinants for  
1262 glycosylphospholipid anchoring of the *Saccharomyces cerevisiae* GAS1 protein to  
1263 the plasma membrane. *Mol Cell Biol*, 11(1), 27-37. doi:10.1128/mcb.11.1.27
- 1264 Papic, D., Elbaz-Alon, Y., Koerdt, S. N., Leopold, K., Worm, D., Jung, M., . . . Rapaport,  
1265 D. (2013). The role of Djp1 in import of the mitochondrial protein Mim1  
1266 demonstrates specificity between a cochaperone and its substrate protein. *Mol*  
1267 *Cell Biol*, 33(20), 4083-4094. doi:10.1128/mcb.00227-13
- 1268 Popolo, L., Grandori, R., Vai, M., Lacana, E., & Alberghina, L. (1988). Immunochemical  
1269 characterization of gp115, a yeast glycoprotein modulated by the cell cycle. *Eur*  
1270 *J Cell Biol*, 47(2), 173-180.
- 1271 Preissler, S., Reuther, J., Koch, M., Scior, A., Bruderek, M., Frickey, T., & Deuerling,  
1272 E. (2015). Not4-dependent translational repression is important for cellular  
1273 protein homeostasis in yeast. *Embo j*, 34(14), 1905-1924.  
1274 doi:10.15252/embj.201490194
- 1275 Pyhtila, B., Zheng, T., Lager, P. J., Keene, J. D., Reedy, M. C., & Nicchitta, C. V.  
1276 (2008). Signal sequence- and translation-independent mRNA localization to the  
1277 endoplasmic reticulum. *Rna*, 14(3), 445-453. doi:10.1261/rna.721108
- 1278 Robinson, J. S., Klionsky, D. J., Banta, L. M., & Emr, S. D. (1988). Protein sorting in  
1279 *Saccharomyces cerevisiae*: isolation of mutants defective in the delivery and  
1280 processing of multiple vacuolar hydrolases. *Mol Cell Biol*, 8(11), 4936-4948.  
1281 doi:10.1128/mcb.8.11.4936
- 1282 Rose, M. D., Misra, L. M., & Vogel, J. P. (1989). KAR2, a karyogamy gene, is the yeast  
1283 homolog of the mammalian BiP/GRP78 gene. *Cell*, 57(7), 1211-1221.  
1284 doi:10.1016/0092-8674(89)90058-5
- 1285 Schwarz, M., Knauer, R., & Lehle, L. (2005). Yeast oligosaccharyltransferase consists  
1286 of two functionally distinct sub-complexes, specified by either the Ost3p or  
1287 Ost6p subunit. *FEBS Lett*, 579(29), 6564-6568.  
1288 doi:10.1016/j.febslet.2005.10.063
- 1289 Shyu, P., Jr., Ng, B. S. H., Ho, N., Chaw, R., Seah, Y. L., Marvalim, C., & Thibault, G.  
1290 (2019). Membrane phospholipid alteration causes chronic ER stress through  
1291 early degradation of homeostatic ER-resident proteins. *Sci Rep*, 9(1), 8637.  
1292 doi:10.1038/s41598-019-45020-6
- 1293 Simpson, C. E., Lui, J., Kershaw, C. J., Sims, P. F., & Ashe, M. P. (2014). mRNA  
1294 localization to P-bodies in yeast is bi-phasic with many mRNAs captured in a  
1295 late Bfr1p-dependent wave. *J Cell Sci*, 127(Pt 6), 1254-1262.  
1296 doi:10.1242/jcs.139055
- 1297 Singer-Kruger, B., & Jansen, R. P. (2014). Here, there, everywhere. mRNA localization  
1298 in budding yeast. *RNA Biol*, 11(8), 1031-1039. doi:10.4161/rna.29945
- 1299 Sorensen, D. M., Holen, H. W., Pedersen, J. T., Martens, H. J., Silvestro, D., Stanchev,  
1300 L. D., . . . Palmgren, M. (2019). The P5A ATPase Spf1p is stimulated by  
1301 phosphatidylinositol 4-phosphate and influences cellular sterol homeostasis.  
1302 *Mol Biol Cell*, 30(9), 1069-1084. doi:10.1091/mbc.E18-06-0365

- 1303 Spiro, R. G. (2002). Protein glycosylation: nature, distribution, enzymatic formation,  
1304 and disease implications of glycopeptide bonds. *Glycobiology*, 12(4), 43r-56r.  
1305 doi:10.1093/glycob/12.4.43r
- 1306 Stevens, K. L. P., Black, A. L., Wells, K. M., Yeo, K. Y. B., Steuart, R. F. L., Stirling, C.  
1307 J., . . . Mousley, C. J. (2017). Diminished Ost3-dependent N-glycosylation of the  
1308 BiP nucleotide exchange factor Sil1 is an adaptive response to reductive ER  
1309 stress. *Proc Natl Acad Sci U S A*, 114(47), 12489-12494.  
1310 doi:10.1073/pnas.1705641114
- 1311 Stirling, C. J., Rothblatt, J., Hosobuchi, M., Deshaies, R., & Schekman, R. (1992).  
1312 Protein translocation mutants defective in the insertion of integral membrane  
1313 proteins into the endoplasmic reticulum. *Mol Biol Cell*, 3(2), 129-142.  
1314 doi:10.1091/mbc.3.2.129
- 1315 Strahl-Bolsinger, S., & Tanner, W. (1991). Protein O-glycosylation in *Saccharomyces*  
1316 *cerevisiae*. Purification and characterization of the dolichyl-phosphate-D-  
1317 mannose-protein O-D-mannosyltransferase. *Eur J Biochem*, 196(1), 185-190.  
1318 doi:10.1111/j.1432-1033.1991.tb15802.x
- 1319 Taxis, C., & Knop, M. (2006). System of centromeric, episomal, and integrative vectors  
1320 based on drug resistance markers for *Saccharomyces cerevisiae*.  
1321 *Biotechniques*, 40(1), 73-78. doi:10.2144/000112040
- 1322 te Heesen, S., Janetzky, B., Lehle, L., & Aebi, M. (1992). The yeast WBP1 is essential  
1323 for oligosaccharyl transferase activity in vivo and in vitro. *Embo j*, 11(6), 2071-  
1324 2075.
- 1325 te Heesen, S., Knauer, R., Lehle, L., & Aebi, M. (1993). Yeast Wbp1p and Swp1p form  
1326 a protein complex essential for oligosaccharyl transferase activity. *Embo j*,  
1327 12(1), 279-284.
- 1328 Tong, A. H., & Boone, C. (2006). Synthetic genetic array analysis in *Saccharomyces*  
1329 *cerevisiae*. *Methods Mol Biol*, 313, 171-192. doi:10.1385/1-59259-958-3:171
- 1330 Torres-Quiroz, F., Garcia-Marques, S., Coria, R., Randez-Gil, F., & Prieto, J. A. (2010).  
1331 The activity of yeast Hog1 MAPK is required during endoplasmic reticulum  
1332 stress induced by tunicamycin exposure. *J Biol Chem*, 285(26), 20088-20096.  
1333 doi:10.1074/jbc.M109.063578
- 1334 Travers, K. J., Patil, C. K., Wodicka, L., Lockhart, D. J., Weissman, J. S., & Walter, P.  
1335 (2000). Functional and genomic analyses reveal an essential coordination  
1336 between the unfolded protein response and ER-associated degradation. *Cell*,  
1337 101(3), 249-258. doi:10.1016/s0092-8674(00)80835-1
- 1338 Weidner, J., Wang, C., Prescianotto-Baschong, C., Estrada, A. F., & Spang, A. (2014).  
1339 The polysome-associated proteins Scp160 and Bfr1 prevent P body formation  
1340 under normal growth conditions. *J Cell Sci*, 127(Pt 9), 1992-2004.  
1341 doi:10.1242/jcs.142083
- 1342 Willer, T., Amselgruber, W., Deutzmann, R., & Strahl, S. (2002). Characterization of  
1343 POMT2, a novel member of the PMT protein O-mannosyltransferase family  
1344 specifically localized to the acrosome of mammalian spermatids. *Glycobiology*,  
1345 12(11), 771-783. doi:10.1093/glycob/cwf086
- 1346 Winterhalter, P. R., Lommel, M., Ruppert, T., & Strahl, S. (2013). O-glycosylation of  
1347 the non-canonical T-cadherin from rabbit skeletal muscle by single mannose  
1348 residues. *FEBS Lett*, 587(22), 3715-3721. doi:10.1016/j.febslet.2013.09.041
- 1349 Xu, C., & Ng, D. T. (2015a). Glycosylation-directed quality control of protein folding.  
1350 *Nat Rev Mol Cell Biol*, 16(12), 742-752. doi:10.1038/nrm4073
- 1351 Xu, C., & Ng, D. T. (2015b). O-mannosylation: The other glycan player of ER quality  
1352 control. *Semin Cell Dev Biol*, 41, 129-134. doi:10.1016/j.semcdb.2015.01.014

- 1353 Xu, C., Wang, S., Thibault, G., & Ng, D. T. (2013). Futile protein folding cycles in the  
1354 ER are terminated by the unfolded protein O-mannosylation pathway. *Science*,  
1355 *340*(6135), 978-981. doi:10.1126/science.1234055
- 1356 Zakrzewska, A., Palamarczyk, G., Krotkiewski, H., Zdebska, E., Saloheimo, M.,  
1357 Penttila, M., & Kruszewska, J. S. (2003). Overexpression of the gene encoding  
1358 GTP:mannose-1-phosphate guanyltransferase, mpg1, increases cellular GDP-  
1359 mannose levels and protein mannosylation in *Trichoderma reesei*. *Appl Environ*  
1360 *Microbiol*, *69*(8), 4383-4389. doi:10.1128/aem.69.8.4383-4389.2003
- 1361 Zatorska, E., Gal, L., Schmitt, J., Bausewein, D., Schuldiner, M., & Strahl, S. (2017).  
1362 Cellular Consequences of Diminished Protein O-Mannosyltransferase Activity  
1363 in Baker's Yeast. *Int J Mol Sci*, *18*(6). doi:10.3390/ijms18061226
- 1364 Zhu, A., Ibrahim, J. G., & Love, M. I. (2019). Heavy-tailed prior distributions for  
1365 sequence count data: removing the noise and preserving large differences.  
1366 *Bioinformatics*, *35*(12), 2084-2092. doi:10.1093/bioinformatics/bty895
- 1367 Zweytick, D., Hrastnik, C., Kohlwein, S. D., & Daum, G. (2000). Biochemical  
1368 characterization and subcellular localization of the sterol C-24(28) reductase,  
1369 erg4p, from the yeast *saccharomyces cerevisiae*. *FEBS Lett*, *470*(1), 83-87.  
1370 doi:10.1016/s0014-5793(00)01290-4  
1371
